# Supplementary material for: Size resolved morphological properties of the high Arctic summer aerosol during ASCOS-2008
Source: Copernicus journal article supplement (doi:10.5194/acp-2015-966), 2016-01-19
Supplement: Supplementary file 1 [file acp-2015-966-supplement.pdf]

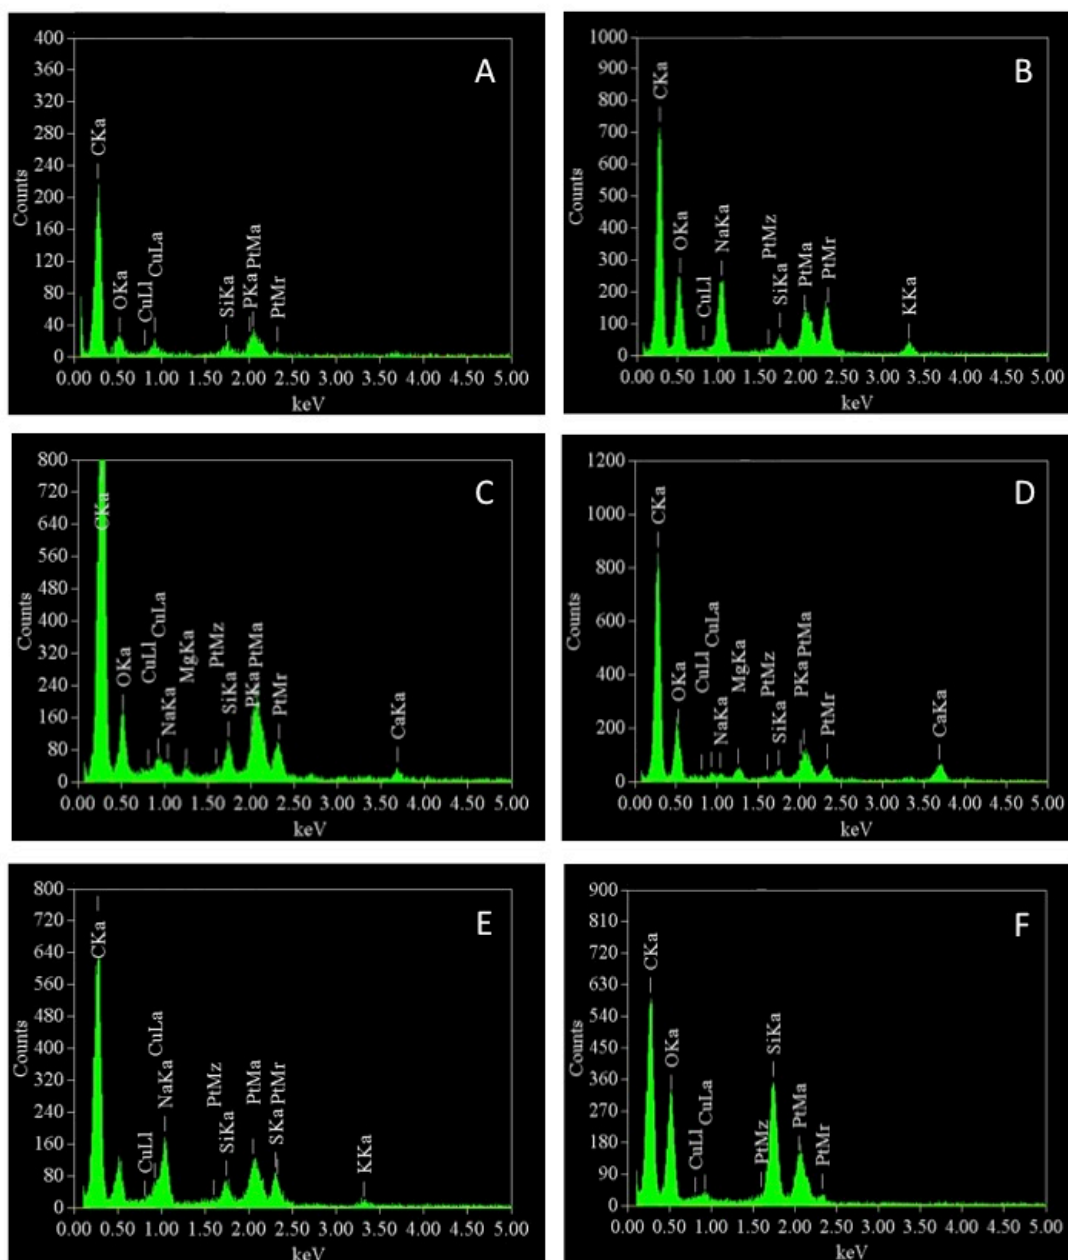

Figure S1: Examples of EDX spectra for the aerosol particle types observed (A) single particle containing neither  $\text{Na}^+/\text{K}^+$  nor  $\text{Ca}^{2+}/\text{Mg}^{2+}$  (B) “*aggregate*” particle containing  $\text{Na}^+/\text{K}^+$  (C) “*aggregate with film*” particle containing  $\text{Na}^+$  and minor contents of  $\text{Ca}^{2+}/\text{Mg}^{2+}$  (D) “*mucus-like*” particle containing  $\text{Ca}^{2+}/\text{Mg}^{2+}$  and minor contents of  $\text{Na}^+$  (E) halo particle containing  $\text{Na}^+/\text{K}^+$  and S probably in the satellite particles (F) blank spectrum taken from a Pt-shadowed TEM grid
