# Supplementary material for: Size resolved morphological properties of the high Arctic summer aerosol during ASCOS-2008
Source: Copernicus journal article supplement (doi:10.5194/acp-2015-966), 2016-01-19
Supplement: Supplementary file [file acp-2015-966-AC3-supplement.pdf]

1 **Size resolved morphological properties of the high**  
2 **Arctic summer aerosol during ASCOS-2008**

3

4 **E. Hamacher-Barth<sup>1</sup>, C. Leck<sup>1</sup> and K. Jansson<sup>2</sup>**

5 [1] {Department of Meteorology, Stockholm University, Stockholm, Sweden}

6 [2] {Department of Materials and Environmental Chemistry, Stockholm  
7 University, Stockholm, Sweden}

8 Correspondence to: E. Hamacher-Barth (evelyne@misu.su.se)

9

10 **Abstract**

11 The representation of aerosol properties and processes in climate models is fraught  
12 with large uncertainties. Especially at high northern latitudes a strong under-  
13 prediction of aerosol concentrations and nucleation events is observed and can only be  
14 constrained by in situ observations based on the analysis of individual aerosol  
15 particles. To further reduce the uncertainties surrounding aerosol properties and their  
16 potential role as cloud condensation nuclei this study provides observational data  
17 resolved over size on morphological and chemical properties of aerosol particles  
18 collected in the summer high Arctic, north of 80° N.

19 Aerosol particles were imaged with scanning and transmission electron microscopy  
20 and further evaluated with digital image analysis. In total 3903 particles were imaged  
21 and categorized according to morphological similarities into three gross  
22 morphological groups, single particles, gel particles and halo particles. Single  
23 particles were observed between 15 nm and 800 nm in diameter and represent the  
24 dominating type of particles (82%). The majority of particles appeared to be marine  
25 gels with a broad Aitken mode peaking at 70 nm accompanied by a minor fraction of  
26 ammonium (bi)sulfate with a maximum in number concentration at 170 nm. Gel  
27 particles (11% of all particles) were observed between 45 nm and 800 nm with a  
28 maximum in number concentration at 154 nm. Imaging with transmission electron  
29 microscopy allowed further morphological discrimination of gel particles in  
30 “*aggregate*” particles, “*aggregate with film*” particles and “*mucus-like*” particles.

1 Halo particles were observed above 75 nm and appeared to be ammonium (bi)sulfate  
2 (59% of halo particles), gel matter (19%) or decomposed gel matter (22%) internally  
3 mixed with sulfuric acid and/or methane sulfonic acid or ammonium (bi)sulfate with a  
4 maximum in number concentration at 161 nm in diameter.

5 Elemental dispersive X-ray spectroscopy analysis of individual particles revealed  
6 prevalence of the monovalent ions  $\text{Na}^+/\text{K}^+$  for single particles and “*aggregate*”  
7 particles and of the divalent ions  $\text{Ca}^{2+}/\text{Mg}^{2+}$  for “*aggregate with film*” particles and  
8 “mucus-like” particles. Emanating from those results and in agreement with model  
9 studies reported elsewhere we propose a relationship between the availability of a  
10  $\text{Na}^+/\text{K}^+$  and  $\text{Ca}^{2+}/\text{Mg}^{2+}$  and the length of the biopolymer molecules participating in the  
11 formation of the 3D gel networks.

## 12 **1 Introduction**

13 Aerosol particles have major impacts on the climate of our planet. **They alter the**  
14 **planetary albedo both directly by absorbing and scattering sunlight and indirectly by**  
15 **modifying the reflectivity, life-time and extent of clouds (Twomey, 1977; Albrecht,**  
16 **1989; Solomon et al., 2007).** Despite of the shown importance aerosol particles have  
17 on clouds their effects still give rise to large uncertainties in climate models (Schimel  
18 et al., 1996; Penner et al., 2001; Forster et al., 2007). Detailed model analyses have  
19 contributed to an enhanced understanding of the parametric uncertainties in global  
20 aerosol models and point towards significant uncertainties arising from an incomplete  
21 representation of aerosol processes and emissions in the models (e.g. Lee et al., 2013;  
22 Carslaw et al., 2013; Mann et al., 2014). Especially for high northern latitudes a  
23 strong under-prediction of aerosol particle concentrations and nucleation events in  
24 summer compared to measurements is recognized (Mann et al., 2014) leading to an  
25 insufficient representation of cloud condensation nuclei (CCN), the fraction of an  
26 aerosol particle population that can activate and form cloud droplets, within the  
27 models. Moreover, the microphysical properties of the cloud droplets are strongly  
28 related to the size, chemical composition, morphology and state of mixture of the  
29 activated CCN. Size resolved data based on the analysis of individual particles are  
30 therefore indispensable for an appropriate parameterization of aerosol particles within  
31 aerosol models.

32 The sources of aerosol particles in the Arctic are subjected to large regional and  
33 seasonal differences. In late winter/spring a pronounced anthropogenic influence on

1 the Arctic is observed, a phenomenon known as Arctic haze (Shaw, 1995). During  
2 that time the Arctic air mass expands southwards towards Eurasia and North America  
3 and anthropogenic emissions are transported into the Arctic where they remain for  
4 prolonged times (Shaw, 1995; Douglas and Sturm, 2003). The aerosol during periods  
5 of Arctic haze is characterised by relatively high concentrations of aged aerosol  
6 predominantly in the accumulation mode (Shaw, 1984; Heintzenberg and Leck, 1994;  
7 Ström et al., 2003; Engvall et al., 2008; Korhonen et al., 2008). The air masses  
8 arriving in summer, however, originate from sectors over the oceans with limited  
9 man-made activities and the transport into the Arctic is slower compared to winter  
10 conditions (Stohl, 2006). The summer conditions are thus much more pristine and the  
11 aerosol shifts from being accumulation mode dominated to be Aitken mode  
12 dominated (Heintzenberg et al., 2006; 2015; Engvall et al., 2008).

13 Over the high Arctic pack ice north of 80° number concentrations of CCN show a  
14 large temporal variability, ranging over 2-3 orders of magnitude but usually are below  
15 100 cm<sup>-3</sup> and occasionally less than 1 cm<sup>-3</sup> (Lannefors et al., 1983; Bigg et al., 1996;  
16 Bigg and Leck, 2001a; Mauritsen et al., 2011; Leck and Svensson, 2015). These  
17 relatively low CCN concentrations have a significant impact on the formation of low-  
18 level (stratiform) clouds prevalent in the high Arctic summer. Mauritsen et al. (2011)  
19 identified a regime with very low CCN concentrations (< 10 cm<sup>-3</sup>) where cloud  
20 formation is limited mainly by the availability of CCN. Such low CCN concentrations  
21 occur as a result of weak local aerosol sources and effective wet deposition (Nilsson  
22 and Leck, 2002; Held et al., 2011a,b; Heintzenberg et al., 2006; Leck and Svensson,  
23 2015) at the marginal ice zone and over the pack ice.

24 However, the physical and chemical properties which determine the ability of the  
25 summer high Arctic aerosol particles to act as CCN are still not very well understood.  
26 Attempts to theoretically predict concentrations of CCN in closure studies resulted in  
27 both over- and under-predictions of the observed CCN concentrations (Zhou et al.,  
28 2001; Bigg and Leck, 2001a; Lohman and Leck, 2005; Martin et al., 2011; Leck and  
29 Svensson, 2015). The most recent closure study by Leck and Svensson (2015)  
30 simulated the cloud nucleation process by assuming Köhler theory together with a  
31 Lagrangian adiabatic air parcel model that solves the kinetic formulation for  
32 condensation of water on size resolved aerosol particles. The authors suggested a  
33 larger fraction of the internally/externally mixed water-insoluble particles in the  
34 smaller aerosol size ranges and kinetically restricted growth of the activated particles.

1 The non-water soluble particle fraction was suggested to physically and chemically  
2 behave as polymer gels<sup>1</sup> with a dichotomous behavior (low hygroscopic growth factor  
3 but a high CCN activation efficiency) in cloud droplet activation as a result of the  
4 interaction of the hydrophilic and hydrophobic entities on the structures of the high  
5 Arctic polymer gels (Orellana et al., 2011). On average 32% of the Arctic **surface**  
6 **ocean** DOM assembled as microgels (Orellana et al., 2011), a significantly higher  
7 percentage than reported for other ocean regions (10%; Chin et al., 1998; Verdugo et  
8 al., 2004). All together these findings strongly supported the previously unverified  
9 hypothesis of a link between cloud formation and polymer gels in the surface  
10 microlayer (SML, <1000 µm thick at the air-sea interface) of the high Arctic open  
11 leads (Bigg et al., 2004; Leck and Bigg, 1999; Leck et al., 2002; Leck and Bigg, 2005b;  
12 Bigg and Leck, 2008; Leck and Bigg, 2010).

13 The transport of marine gels into the atmosphere is thought to happen via the burst of  
14 air bubbles at the air-sea interface. Air bubbles rising within the water column  
15 scavenge surface-active organic matter especially from the surface microlayer to their  
16 outer walls (Wotton and Preston, 2005). Bursting of the bubbles at the water surface  
17 produces small jet and film drops containing organic surface-active compounds,  
18 debris of phytoplankton, bacteria, viruses and sea salt (Blanchard and Woodcock,  
19 1957; Blanchard, 1971, Blanchard and Syzdek, 1988; Gershey, 1983; O'Dowd et al.,  
20 1999) which are transported further up into the atmosphere through turbulent mixing  
21 processes. However, studies of individual particles by Bigg and Leck (2001; 2008);  
22 Leck et al., (2002); Leck and Bigg (2005a; 2005b) over the perennial ice have failed  
23 to find evidence of sea salt particles of less than 200 nm in diameter. In the Arctic  
24 breaking waves as a source of bubbles are rare due to low wind speeds and short  
25 fetches between the ice floes (Tjernström et al., 2012). Even in the absence of wind-  
26 driven breaking waves a recent study has now confirmed both the presence and  
27 temporal variability of a population of bubbles within the open leads (Norris et al.,  
28 2011). The considered mechanisms for bubble formation and mixing were induced by  
29 changes in gas saturation. Other possible bubble formation mechanisms are  
30 respiration from algae and phytoplankton (Medwin, 1970; Johnson and Wangersky,  
31 1987) and the release of trapped air from melting ice (Wettlaufer, 1998).

---

<sup>1</sup> Phytoplankton and bacteria in surface seawater produce varying amounts of mucus- or gel-like matter comprised of biopolymers like proteins, polysaccharides or lipids that form 3-dimensional networks inter-bridged with divalent ions, preferably Ca<sup>2+</sup> and Mg<sup>2+</sup>. This type of supramolecular organisation is referred to as marine gels. (Verdugo, 2012 gives a review).

1 Due to the remoteness and the harsh conditions in the high Arctic the number of  
2 aerosol studies from this region is limited; the data available rely on four expeditions  
3 onboard the Swedish icebreaker *Oden* during the summers of 1991, 1996, 2001 and  
4 2008 (Leck et al., 1996; 2001, 2004; Tjernström et al., 2014). These expeditions took  
5 advantage of the pristine conditions during the Arctic summer when the Arctic is to a  
6 great extent separated from air masses from polluted mid-latitude sources which  
7 provided the unique opportunity to study aerosol particles from predominantly natural  
8 sources. All other Arctic studies on aerosol chemical composition, morphology and  
9 state of mixture were either performed during winter/spring when transport of  
10 polluted aerosol from lower latitudes into the high Arctic is strong (e.g. Hara et al.,  
11 2003; Xie et al., 2007; Winiger et al., 2015) and/or they were located further south,  
12 outside the pack ice area, missing potential aerosol sources from the pack-ice area and  
13 at the same time including anthropogenic pollutions, e.g. studies from Svalbard (Geng  
14 et al., 2010; Chi et al., 2015).

15 To further reduce the uncertainties surrounding the CCN properties that promote  
16 /suppress cloud droplet formation over the pack ice area an investigation of size,  
17 chemical composition, morphology and state of mixture on the level of individual  
18 aerosol particles is required. The present study will make use of aerosol particles  
19 collected during the most recent icebreaker expedition under the name ASCOS  
20 (Arctic Summer Cloud and Ocean Study) 2008. The Swedish icebreaker *Oden*  
21 departed from Longyearbyen on Svalbard on 2 August and returned on 9 September  
22 2008. After traversing the pack-ice northward the icebreaker was moored to an ice  
23 floe and drifted passively with it around 87° N between 12 August and 1 September  
24 (Tjernström et al., 2014). We used electron microscopy (scanning electron  
25 microscopy (SEM) and transmission electron microscopy (TEM)) to image aerosol  
26 particles at high resolution, and subsequent digital image analysis to objectively  
27 assess size and morphology of the particles on an individual basis. Earlier studies  
28 north of 80° focused rather on a qualitative description of the aerosol in the high  
29 Arctic (Leck and Bigg, 2005, 2008, 2010; Bigg and Leck, 2001b, 2008)  
30 complemented with bulk chemical analyses (Leck et al., 2002; 2013; Leck and  
31 Svensson, 2015; Lohman and Leck, 2005).

32 By individually screening close to 4000 aerosol particles collected during the ice-drift  
33 with SEM and subsequent digital mapping we firstly gained size resolved information  
34 on the aerosol population as a whole. The obtained number size distribution was

1 compared with measurements from an independent method (Tandem Differential  
2 Mobility Particle Sizer, TDMPs) to verify that a representative fraction of the aerosol  
3 population was captured with SEM. Secondly, we sorted all mapped particles  
4 according to morphological differences and a separate number size distribution for  
5 each of the morphological types was obtained. Thirdly, to obtain deeper insights into  
6 the morphological features of the collected particles and to simultaneously assess their  
7 elemental composition with EDX spectroscopy investigated a subpopulation of  
8 aerosol particles in TEM at very high resolution.

9

10

## 1 **2 Methods for sampling of airborne aerosol particles during ASCOS**

### 2 **2.1 Collection of airborne particles**

#### 3 **2.1.1 The sampling inlet**

4 A PM<sub>10</sub>-inlet (9 cm inner diameter) was deployed at ambient conditions (85 – 100 %  
5 relative humidity (RH) and temperatures around 0 °C) to eliminate particles with  
6 diameters > 10 micrometer in equivalent aerosol dynamic diameter (EAD) from the  
7 sampled air. To optimise the distance from the sea surface and the ship's  
8 superstructure the inlet was located forward ~ 25 m above the sea surface and 3 m  
9 above the roof of the laboratory container on the 4<sup>th</sup> deck of the icebreaker. Direct  
10 contamination from the ship was excluded by using a pollution controller, located  
11 directly after the inlet pipe that passed through the roof of the container. Provided that  
12 the wind was within ± 70° of the direction of the bow and stronger than 2 ms<sup>-1</sup>, no  
13 pollution reached the sample inlets (Leck et al., 1996). Directly downstream from the  
14 pollution sensor the electrostatic precipitator and the TDMPS were connected to the  
15 inlet with short stainless steel tubes (length ca. 1 m). To ensure that the sampling  
16 conditions and losses were the same for both instruments, the inlet take-offs for the  
17 two samplers were placed closely together. The temperature in the container was kept  
18 at 20 °C which resulted in a RH of 20% in the secondary lines during sampling. See  
19 Leck et al. (2001) for more details of the set-up for the sampling of aerosol particles.

20 Volatile compounds on particle surfaces and weakly bound water molecules were  
21 probably lost during the sampling procedure. In the Arctic the concentration of  
22 volatile compounds is generally lower than at lower latitudes (Bates et al., 1987) and  
23 losses due to evaporation can thus be considered very small.

#### 24 **2.1.2 The electrostatic precipitator**

25 Using the electrostatic precipitator the aerosol particles were collected directly onto  
26 3 mm copper 300 mesh Formvar-coated TEM grids (TED PELLA Inc.; Dixkens and  
27 Fissan, 1999; Leck and Bigg, 2008). Formvar-coated grids were chosen because of  
28 the hydrophilic and thus polar nature of the Formvar film (Rocha et al., 2005). The  
29 aerosol particles were charged at the inlet of the precipitator by a <sup>63</sup>Ni beta-emitting  
30 radioactive source and precipitated by a 12 kV cm<sup>-1</sup> electric field between the inlet  
31 and the collecting grid surface. The flow rate was kept very low (0.17 mL s<sup>-1</sup>) in order  
32 to collect particles up to ~1 µm in diameter. The collection efficiency of the

1 electrostatic precipitator was intercompared with a TSI 1236 Nanometer Aerosol  
2 Sampler ( $^{63}\text{Ni}$  beta-emitting radioactive source and sample flow of  $1 \text{ Lm}^{-1}$ ) mounted  
3 side-by-side with the electrostatic precipitator. Both collected a small, but statistically  
4 significant number of particles  $< 25 \text{ nm}$  in diameter. The precipitator took samples for  
5 6 to 12 hrs. Before and after sampling the grids were placed within a grid holder box  
6 in a sealed plastic bag, together with silica gel packets, and stored in a desiccator at a  
7 constant temperature of  $20 \text{ }^\circ\text{C}$  in a clean room before they were investigated.

### 8 **2.1.3 The TDMPS-sampling system**

9 The TDMPS-sampling system to measure the number size distributions of dry (20%  
10 RH) sub-micrometer particles used pairs of differential mobility analyzers (DMAs).  
11 The TSI 3010 counters in the DMAs were size and concentration calibrated against an  
12 electrometer and the TSI 3025 counters for particle sizes below  $20 \text{ nm}$  diameter  
13 according to Stolzenburg (1988). This set up yielded a complete number size  
14 distribution from  $3 \text{ nm}$  to  $800 \text{ nm}$  diameter scanned over 45 size channels every 10 -  
15 20 min. Further details of the TDMPS system can be found in Heintzenberg and Leck  
16 (2012). NIST (National Institute of Standards Technology) traceable calibration  
17 standards of polystyrene latex spherical particles were used to determine error in  
18 determination of the mobility diameter to  $\pm 5 \%$  (Wiedensohler et al., 2012).

19 In order to compare the number size distribution obtained from the precipitator  
20 samples (section 2.1.2) with those simultaneously recorded by the TDMPS we  
21 assumed median particle number diameters for each of the 45 TDMPS size channels.  
22 The particle diameters were then merged to form a complete set of diameters across  
23 the TDMPS measuring interval.

## 24 **2.2 Image recording and elemental analysis**

### 25 **2.2.1 Imaging with scanning electron microscopy (SEM)**

26 The samples were investigated with a high-resolution SEM (JEOL JSM-7401) under  
27 high vacuum conditions, at less than  $9.63 \times 10^{-5} \text{ Pa}$  (Stevens et al., 2009). A detailed  
28 description of the setup of the scanning electron microscope can be found in  
29 Hamacher-Barth et al. (2013). The Gentle Beam mode of the microscope was used to  
30 minimize radiation damage of the aerosol particles, avoid surface charge-up and to  
31 demagnify the electron beam diameter (Michael et al., 2010). Correction for  
32 stigmatism and focusing of the electron beam was done every time before imaging an



1 aerosol particle. The grey scale (contrast and brightness) was adjusted automatically  
2 before recording an image.

3 The imaging of the aerosol particles aimed to account for an uneven distribution of  
4 the particles on the TEM grid and to capture a representative fraction of the aerosol  
5 particles. In brief, particles were imaged at a magnification of 40.000 on the TEM  
6 grid squares, along a diagonal from the center of the grid to the edge on 6 to 8 squares  
7 of the TEM grid. Each square was screened systematically to capture a representative  
8 fraction of the aerosol population. For a detailed description of the screening  
9 procedure see Hamacher-Barth et al. (2013).

## 10 **2.2.2 Imaging with transmission electron microscopy (TEM)**

11 To image the samples with TEM they have to be coated by a thin metal layer.  
12 Evaporation of a heavy metal thin coating at an oblique angle onto the sample  
13 increases the mass contrast and accentuates the topography of the aerosol particle by  
14 producing a shadow (William and Carter, 2006). Furthermore shading has the  
15 advantage that the metal cover protects the aerosol particles against heating by the  
16 electron beam during examination, especially at high magnifications. It is also  
17 advantageous that in case of any evaporation from the aerosol particle the metal  
18 replica of the aerosol particle is still visible.

19 The aerosol particles were shaded with platinum (Pt) at an angle of  $\arctan(0.5) = 26^\circ$   
20 (Okada, 1983) in a vacuum chamber at  $10^{-6}$  mbar. Pt was evaporated from a Pt wire  
21 ( $\varnothing$  0.2 mm, 20 mm length). The Pt wire was drawn around a tungsten (W) wire and  
22 evaporated clusters of Pt atoms when the W wire was heated up electrically by a  
23 85 mA current for 30 sec. The shading procedure produces a layer of Pt particles of 1-  
24 2 nm in diameter on the TEM grid.

25 After shadowing the TEM grids were examined in TEM using a JEOL JEM-2100  
26 high-resolution instrument, equipped with a LaB<sub>6</sub> filament and a Si/Li detector crystal.  
27 The TEM grid containing the aerosol particles was mounted on a sample holder made  
28 of Beryllium to avoid background signals from the sample holder material in the EDX  
29 measurements (see chapter 2.2.3). A CCD camera (Gatan SC1000 Orius, 11  
30 Megapixel) in bottom mount position was used to image the aerosol particles. Images  
31 were taken at high vacuum, less than  $35 \times 10^{-5}$  Pa and at an accelerating voltage of  
32 100 kV.

1 Particles were imaged on TEM grid squares along a diagonal from the center of the  
2 grid to the edge on 6 to 8 squares. To avoid imaging of particles that were damaged  
3 by prior imaging with SEM an area of the grid was chosen which was not exposed to  
4 any electron beam at high magnifications before. Screening each square for individual  
5 particles was done at a magnification of 30.000, and images were taken at  
6 magnifications between 25.000 and 80.000.

### 7 **2.2.3 Elemental X-ray spectroscopy**

8 The elemental analyses were performed using an energy dispersive X-ray detector  
9 JED-2300 attached to the JEM-2100 TEM. In order to avoid time consuming  
10 realignment of the electron beam and focusing procedures the EDX-analyses were  
11 also performed at an accelerating voltage of 100 kV. The energy range measured was  
12 0-20 keV, counting rate was typically 1053 counts/sec<sup>-1</sup>, life time 30 sec, real time  
13 33.00 sec and dead time 10 %. Generally EDX spectroscopy allows the detection of  
14 elements  $\geq$  Be as their photon energies are above 100 eV and thus lie within the X-ray  
15 region of the electromagnetic spectrum (Egerton, 2008). Nevertheless the detection of  
16 light elements like C, N, and O that are typical for organic compounds can be difficult  
17 on a Formvar-coated copper grid since the signal intensity can be biased by  
18 attenuation of the X-ray signal through absorption by the adjacent copper grid. For  
19 this reason these elements were not reliably detectable and are thus not part of this  
20 study.

21 Blank grids shadowed with platinum were used to identify the background noise and  
22 signals from the TEM grid including copper from the grid and the Formvar film and  
23 the Pt shadowing. The EDX spectra of blank grids showed only signals from Pt, the  
24 supporting copper TEM grid and carbon and oxygen signals from the Formvar  
25 substrate-film.

26

### 27 **2.2.4 Digital image analysis**

28 Images taken with SEM at a magnification of 40.000 were evaluated using an  
29 optimized commercial image processing software (Aphelion™ Dev 4.10). In brief,  
30 the maximal intensity of the neighboring background of each aerosol particle was  
31 determined. Using exactly the same image but including the aerosol particle allowed

1 the separation of the particle and measurement of the particle area in pixels  
2 (Hamacher-Barth et al., 2013).

3 The particle size was calculated according to Eq. (1)

$$4 \quad D_{pa} = 2 \sqrt{Area/\pi} \quad (1)$$

5 with  $D_{pa}$  as the particle equivalent diameter, which is the diameter of a circle that  
6 comprises the same area as the aerosol particle projected onto a two-dimensional  
7 surface (Allen, 1997; Hinds, 1999). The value for the area is calculated from the  
8 number of pixels counted for each particle. A number size distribution of the aerosol  
9 sample was obtained using MATLAB 2011a and the freely available software  
10 package EasyFit.

11

## 12 **3 Results and discussion**

13 To verify that a representative fraction of the aerosol population has been captured  
14 with SEM we firstly calculated a number size distribution of all aerosol particles and  
15 compare it with measurements from TDMPS. Secondly we sorted all particles imaged  
16 according to morphological similarities into three gross groups, named: single  
17 particles (SP), gel-like particles (GP) and halo particles (HP), shown in Fig. 2. Thirdly,  
18 to obtain more subtle insights into the morphological features of the collected aerosol  
19 particles and simultaneously assess their elemental composition we investigated a  
20 subpopulation of the aerosol particles with TEM and EDX spectroscopy at very high  
21 resolution.

### 22 **3.1 Total number size distributions**

23 In order to derive an overall number size distribution we imaged in total 3909 aerosol  
24 particles at a magnification of 40,000 with SEM. The number size distribution of all  
25 imaged aerosol particles exhibited a maximum in the Aitken mode region at 32 nm in  
26 diameter and a double peak above 70 nm in the accumulation mode region with maxima at 89  
27 nm and 147 nm with a shoulder to larger diameters at around 335 nm (see Fig. 3, red line).  
28 Hamacher-Barth et al. (2013) used the same image mapping method as used in this  
29 study and determined the error of sizing for polystyrene latex spheres of several  
30 diameter sizes between 20 nm and 900 nm was determined. The error values are  
31 displayed in Fig. 3, red arrows. For the TDMPS number size distribution we assumed

1 an error in determining the mobility diameter of 5% across the whole measuring  
2 interval (Wiedensohler et al., 2012).

3 The two approaches show an overall good agreement between their number size  
4 distributions with a similar modal structure with an Aitken mode below 80 nm and an  
5 accumulation mode at higher diameters. The reduced particle number concentration in  
6 the Aitken mode seen by SEM was probably caused by their partly weak contrast to  
7 the Formvar film, which either resulted in an underestimation of the size or that the  
8 particles remained undetected. The accumulation mode was separated into a double  
9 peak with particle number maxima at 89 nm and 147 nm in SEM and 106 nm and 158  
10 nm in diameter in TDMPS. The aerosol particles at diameters > 100 nm often showed  
11 a patchy and inhomogeneous appearance which might have lead to an  
12 underestimation of their size and the observed shift to smaller diameters in SEM, at  
13 147 nm compared to 173 nm in TDMPS and broadening of the maximum at 335 nm.

14 In general the number size distributions determined for particle sizes larger than 20  
15 nm in diameter showed the typical modal features of aerosol collected in the high  
16 Arctic summer boundary layer (Covert et al., 1996; Heintzenberg et al., 2006) with  
17 an Aitken mode between 26 nm and 80 nm and the multimodal accumulation size  
18 range between 80 nm and 1000 nm (Heintzenberg and Leck, 2012) with the so called  
19 Hoppel minimum around 80 nm inbetween (Hoppel, 1986).

### 20 **3.2 Single particles**

21 Single particles (SP) seen by SEM appeared as single entities that mostly contrasted  
22 sharply and thus could be easily separated from their Formvar background for  
23 diameters > 40 nm. At smaller diameters, however, the contrast to the background was  
24 often weak and probably resulted in an underestimation of particle size or non-  
25 detection of particles. Imaged examples of SP are shown in Figure 4. Of the 3909  
26 particles that were mapped SP were the overall dominating type of particles, 82% of  
27 the total aerosol particles were attributed to this group (Table 1). They were observed  
28 over the whole size range, between 15 nm and 800 nm in diameter with a broad  
29 Aitken mode peaking at 64 nm accompanied by a less pronounced peak at 27 nm. The  
30 majority of SP (80%) appeared in the Aitken mode size region and below 80 nm in  
31 diameter (Table 1). In the accumulation mode size range 18% of SP appeared between  
32 80 and 200 nm with a maximum at 106 nm in diameter and the remaining 2% of the  
33 SP were detected in diameter sizes (Table 1) > 200 nm (Fig. 5, upper panel). We  
34 observed that 35% of the SP partly evaporated under the SEM electron beam but

1 retained their outer shape on the timescale of minutes. Also at a higher magnification  
2 using TEM the same behavior was seen for 30% of the particles. We tentatively  
3 assigned these particles to be ammonium (bi)sulfate particles. We were guided by the  
4 results published by Heard and Wiffen (1969) and Bigg and Leck (2001b) where  
5 particles with the same morphological features and instability under the electron  
6 microscope were made up by ammonium sulfate, bisulfate or methane sulfonate  
7 mixtures. The presence of ammonium sulfate or bisulfate particles would be  
8 supported by the fact that ammonia has been reported to be the predominant base in  
9 the remote marine troposphere (Söderlund, 1982) that undergoes primarily acid-base  
10 reactions with non-seasalt  $\text{H}_2\text{SO}_4$ , an oxidation product of biogenic dimethyl sulfide,  
11 DMS (Quinn et al., 1987). Leck and Persson confirmed the presence of ammonia  
12 bisulfate particles both along the marginal ice edge and over the inner parts of the  
13 pack ice. Over remote marine locations at lower latitudes Meszaros and Vissy (1974)  
14 observed, by means of electron microscopy, ammonium bisulfate concentrations up to  
15 38%, on average 24%, with the highest particle concentrations between 100 nm and 1  
16  $\mu\text{m}$  in diameter. In the literature chemical tests have also been used to identify  
17 ammonium and sulfate in samples investigated by TEM (Bigg and Leck, 2001b).  
18 Such tests were not implemented during this study since the use of chemicals would  
19 have added additional mass onto the particles. This would have altered the size and  
20 the morphology of the particles and hampered the investigation of the aerosol  
21 particles with TEM and EDX spectroscopy.

22 The presence of biogenic nitrate as a counter ion to ammonium can be considered  
23 rather unlikely since the formation of ammonium nitrate happens only after all sulfate  
24 has been neutralized (Kuhn et al., 2010). Nitrate concentrations from impactor  
25 measurements during ASCOS show nitrate values that are one order of magnitude  
26 lower than sulfate concentrations at the same time, usually below  $0.1 \text{ nmolm}^{-3}$  (C.  
27 *Leck pers. comm., 2015*). Moreover ammonium nitrate does not evaporate and is  
28 stable under the electron beam (Rao et al., 1989). To minimize biases due to  
29 evaporative losses and beam damage the ammonium sulfate particles were imaged as  
30 quickly as possible. Figure 6 (upper panel) shows the number size distribution of the  
31 ammonium sulfate particles derived from the TEM images with a maximum at 172  
32 nm in the accumulation mode.

33 The remaining 65% of the imaged particles (Fig. 5, upper panel) were stable under the  
34 heat of the electron beam and showed no sign of evaporation or changes in  
35 morphology. Some of those particles appeared as skeletal structures (Fig. 4B) that

1 collapsed and merged to an unstructured flat appearance after exposure times to the  
2 electron beam significantly longer than the justified time for imaging of the particles.  
3 None of the SP particles showed an apparently crystalline appearance that could be  
4 attributed to sea salt or any other inorganic crystalline matter.  
5

### 6 **3.3 Gel-like particles**

7 Aerosol particles classified as gel-like particles (GP) using SEM showed an  
8 amorphous texture with an inhomogeneous distribution of pixel intensity. Their  
9 diffuse structure and weak contrast to the Formvar-film suggested that these particles  
10 predominantly contain light elements like C, H, N and O, which are typical  
11 components of organic matter. The contrast between the particles and the Formvar-  
12 film provides (indirect) information about the elemental composition of the aerosol  
13 particle since the number of the detected secondary electrons increases with  
14 increasing atomic number of the elements present in the aerosol particle (Zhou et al.,  
15 2006) suggesting that the aerosol particles under investigation are built up by matter  
16 of biological origin. The potential similarity in chemical composition between the GP  
17 and the Formvar-film might have lead to an underestimation of the particle size which  
18 resulted in the shift of the higher accumulation mode peak at 173 nm in TDMPS to  
19 147 nm in the total number size distribution (Fig. 3).

20 GP appeared in the Aitken mode at diameters above 45 nm but were most frequently  
21 observed in the accumulation mode with a maximum at 174 nm, covering all sizes up  
22 to 800 nm (Fig. 5, middle panel). In total 11% of the 3909 particles that were imaged  
23 were classified as GP of which 24% were observed in the Aitken mode > 45 nm, 49%  
24 appeared in the accumulation mode between 80 nm and 200 nm and 27% were  
25 observed > 200 nm (Table 1).

26 Particles classified as GP were further evaluated with TEM. The higher resolution of  
27 the TEM images revealed better insights into the morphology of the particles and the  
28 GP could be further divided into subgroups (see Fig. 2). 14% of the particles consisted  
29 of a conglomeration of smaller spherical subunits that were welded together and  
30 formed small chains or agglomerates (Fig. 7A, B). Those particles were named  
31 “*aggregate*” particles. 29% of the gel particles appeared as “*aggregate with film*”  
32 particles where “*aggregate*” particles were covered with a diffuse and nearly  
33 electron-transparent film that partly obscured the underlying subunits and produced a

1 more smooth appearance compared to the bare “*aggregate*” particles  
2 (Fig. 7 C, D and E). However, the majority of GP, 57%, showed a “*mucus-like*”  
3 texture that was many times widely outspread on the Formvar-film (Fig. 8 A, B),  
4 partly in long drawn-out structures (Fig. 8 C) or with small electron dense inclusions  
5 (Fig. 8 D).

6 The individual subunits of “*aggregate*” particles and the dense spots in “*mucus-like*”  
7 particles exhibit diameters between 11 nm and 109 nm with a maximum in number  
8 size distribution at 39 nm and a smaller maximum at 28 nm. Fig. 9 compares the size  
9 distributions of “*aggregate*” components from this study (red line) with those from  
10 previous studies in the high Arctic and at lower latitudes (Leck and Bigg, 2005a;  
11 2008; 2010). Similarity with previous studies outside and within the pack ice (Leck  
12 and Bigg, 2005b; Orellana et al., 2011, same period as this study) strongly suggests  
13 the presence of airborne marine gels. Entanglements, ionic or hydrophobic  
14 interactions and/or hydrogen bonds stabilize the three-dimensional biopolymer  
15 networks of the marine polymer gels, with electrostatic bonds involving  $\text{Ca}^{2+}$  or  $\text{Mg}^{2+}$   
16 ions being the most dominating (Verdugo, 2012; Orellana and Leck, 2015). In  
17 seawater the observed size range of gel particles ranges from so-called nanogels (100-  
18 200 nm; Bigg et al., 2004) that can further anneal into microgels (> 1000 nm) by  
19 interpenetration and entanglement of neighboring nanogels or hydrophobic interaction.  
20 Changes in environmental factors like UV-B radiation (Orellana and Verdugo, 2003)  
21 or physico-chemical parameters like pH and temperature (Tanaka et al., 1980) lead to  
22 inhibition/dispersion or volume change of the gel polymer assemblies. The transport  
23 from the ocean water into the atmosphere results in an enhanced exposure of the gel  
24 particles to solar UV-B radiation. Together with changes in the physico-chemical  
25 environment of the gel particles due to e.g. condensation of acidic gases onto the  
26 aerosol droplets the transport into the atmosphere thus might lead to fragmentation  
27 and/or shrinking of the gel matter and result in a reduced diameter of atmospheric gel  
28 particles compared to gel matter in the ocean (Leck and Bigg, 2005b; Orellana et al,  
29 2011). Embedded in the polymer network is the high content of water (99%) that  
30 prevents the network from collapsing (Chin et al., 1998). The biopolymer networks of  
31 marine gels are highly surface active and show refractory properties are therefore not  
32 expected to evaporate under the electron beam.

### 1 3.4 Halo particles

2 Besides SP and GP we observed particles with a halo-like appearance (halo particles,  
3 HP) on the TEM grid where a relatively large central particle was surrounded by a  
4 droplet ring structure of numerous smaller particles (for examples see Fig. 10).

5 Several authors (Farlow et al., 1977; Bigg, 1986; Bigg et Leck, 2001b) have found  
6 that the formation of droplet ring structures from sulphuric acid containing aerosol is  
7 a result of humidity, hydrophilicity of the collection surface and impact velocity  
8 effects. Bigg and Leck (2001b) observed that a solution of sulfuric acid wets out on a  
9 hydrophilic surface but retracts when humidity is reduced, leaving behind small  
10 droplets in a symmetrical ring. In our study the sampling procedure led to a drastical  
11 reduction in relative humidity, from around 100% at ambient conditions to 20%  
12 within the sampling manifold (see chapter 2.1.1) and the aerosol was impacted onto a  
13 surface with hydrophilic properties (TEM grid). We will thus assume that the HP  
14 originally existed as one particle in the atmosphere that splashed out into the droplet  
15 ring structure upon impaction onto the substrate.

16 HP comprised 7% of the total number of aerosol particles (Table 1) and appeared at  
17 diameters above 75 nm and thus mainly in the accumulation mode. Number maxima  
18 were found at at 161 nm and 293 nm, respectively (Fig. 5, lower panel, left). The very  
19 weak contrast of the satellite particles against the Formvar background (Fig. 3)  
20 probable shifted the particle number size distribution towards smaller sizes to some  
21 extent.

22 Imaging with TEM allowed a more detailed investigation of the HP and revealed  
23 three morphologically different types of the central particle. Two of the particle types  
24 consisted predominantly of particles with skeletal structures and of particles in the  
25 form of “*aggregates*” or “*aggregate with film*”. The third group consisted of particles  
26 that were in opposite to the former particle types **unstable** under the electron beam  
27 (Fig. 2). Central particles of skeletal structures or “*aggregate*”/“*aggregate with film*”  
28 made up for 19% and 22%, respectively of the HP examined. Examples of both  
29 particle types are shown in Figs. 10(A) and 10(B). The majority of central particles  
30 (59%), however seemed to partly evaporate during the imaging process, leaving more  
31 transparent structures behind, similar to the SP described in chapter 3.2. We sized the  
32 central particles individually in order to compare them with particles of similar  
33 morphology to the SP or GP. The number size distribution of the “*aggregate*”,



1 “*aggregate with film*” and skeletal particles is shown in Fig. 6(B), green line, with a  
2 maximum at 270 nm diameters, compared to the maximum at 171 nm (Fig. 6(B), red  
3 line) resulting from sizing the heat sensitive central particles under the electron beam.  
4 The satellites (particulates or droplets) exhibited varying morphologies. Sometimes  
5 numerous small satellites surrounded the central particle in a symmetrical ring (Fig.  
6 10(A) whereas in other cases the satellite droplets were larger but fewer (Fig. 10(B),  
7 (C)). In the literature three types of compounds have been described to form satellites  
8 when airborne aerosol particles impact on a collection substrate: sulfuric acid (Ayers,  
9 1978; Ferek et al., 1983), ammonium sulfate and bisulfate (Bigg, 1980; Busek and  
10 Pósfai, 1999) and methane sulfonic acid, MSA, (Bigg et al., 1974). Sulfuric acid  
11 exhibits a distinctive morphology: a central particle surrounded by a droplet-halo of  
12 numerous smaller satellites. Neutralization of sulfuric acid by ammonium or a high  
13 content of methane sulfonic acid produces a halo of larger and fewer droplets (Bigg  
14 and Leck, 2001a). The morphology of the droplet-halos we observed in this study  
15 points towards the presence of sulfuric acid, often in a mixture with ammonium  
16 sulfate or bisulfate and/or methane sulfonic acid. As discussed in section 3.2 these  
17 sulfur-containing components have not only been reported to be present over the  
18 Arctic pack ice area in summer (Bigg and Leck, 2001a) but also to frequently occur in  
19 the remote marine atmosphere (Barnard et al., 1994; Capaldo and Pandis, 1997; Kettle  
20 et al., 1999). The observed number size distribution for all HP (Fig. 5, lower panel) is  
21 in agreement with results from the high Arctic reported by Hillamo et al. (2001)  
22 which observed the first maximum in sulfate containing aerosol particles at diameters  
23 > 80 nm and in ammonium and MSA containing particles at diameters > 100 nm.

### 24 **3.5 EDX measurements**

25 To determine the elemental composition of the aerosol samples an EDX spectrometer  
26 coupled to TEM was used. EDX spectra of 103 aerosol particles were recorded in  
27 conjunction with the **imaging** process. Molecular dynamics studies on polysaccharides  
28 by Li et al. (2013) and Sun et al. (2014) have shown that not only the divalent ions  
29  $\text{Ca}^{2+}$  and  $\text{Mg}^{2+}$  but also the monovalent ions  $\text{Na}^+$  and  $\text{K}^+$  can stabilize the three-  
30 dimensional biopolymer gel networks. Inspired by these results we focused on the  
31 detection of the alkali ions  $\text{Na}^+$  and  $\text{K}^+$  and the divalent ions  $\text{Ca}^{2+}$  and  $\text{Mg}^{2+}$  in the gel-  
32 type particles. In the following we will refer to  $\text{Na}^+$  and  $\text{K}^+$  as  $\text{Na}^+/\text{K}^+$  and  $\text{Ca}^{2+}$  and  
33  $\text{Mg}^{2+}$  as  $\text{Ca}^{2+}/\text{Mg}^{2+}$ .

1 The analysis revealed the following characteristics:  $\text{Na}^+/\text{K}^+$  was detected in 91% of  
2 the SP, 13% of these particles contained exclusively  $\text{Na}^+/\text{K}^+$  whereas 78% contained  
3 both types of metal ions,  $\text{Na}^+/\text{K}^+$  and  $\text{Ca}^{2+}/\text{Mg}^{2+}$  with the latter only in minor  
4 quantities (Fig. 11(A)); examples of EDX spectra for the different types of particles  
5 are shown in Fig. S1. The “*aggregate*” particles contained exclusively  $\text{Na}^+/\text{K}^+$  in 20%  
6 of the particles and predominantly  $\text{Na}^+/\text{K}^+$  and minor contents of  $\text{Ca}^{2+}/\text{Mg}^{2+}$  in 80% of  
7 the particles (Fig. 11(B)). For the particle types “*aggregate plus film*” and “*mucus-*  
8 *like*” particles, however, a clear dominance of  $\text{Ca}^{2+}/\text{Mg}^{2+}$  was detected. 17% of the  
9 “*aggregate plus film*” particles contained only  $\text{Ca}^{2+}/\text{Mg}^{2+}$  and 67% of the particles  
10 contained  $\text{Ca}^{2+}/\text{Mg}^{2+}$  accompanied by minor contents of  $\text{Na}^+/\text{K}^+$  (Fig. 11(C)).  
11 “*Aggregate plus film*” particles thus contained to 86%  $\text{Ca}^{2+}/\text{Mg}^{2+}$  as the dominating  
12 type of ions. “*Mucus-like*” particles contained to 11% only  $\text{Ca}^{2+}/\text{Mg}^{2+}$  and up to 86%  
13  $\text{Ca}^{2+}/\text{Mg}^{2+}$  accompanied by minor contents of  $\text{Na}^+/\text{K}^+$ . 97% of the type “*mucus-like*”  
14 particles thus contained  $\text{Ca}^{2+}/\text{Mg}^{2+}$  as the dominating type of metals. In summary, we  
15 observed a gradual transition from particles with a dominating content of  $\text{Na}^+/\text{K}^+$  to  
16 particles with a dominating content of  $\text{Ca}^{2+}/\text{Mg}^{2+}$  moving from SP over “*aggregate*”  
17 particles and “*aggregate with film*” particles to “*mucus-like*” particles. We therefore  
18 hypothesise a connection between the morphology of the particles and the respective  
19 dominating crosslinking ion within the polymer 3-dimensional network of the marine  
20 gels. Li et al. (2013) compared polysaccharides with 3 and 4 repetition units of  
21 molecular weights of 1.9 kDa and 2.5 kDa respectively as representations for organic  
22 matter in seawater (Verdugo, 2004). Their results showed that the assembly of the  
23 longer polysaccharide chains seems to be accelerated in the presence of  $\text{Ca}^{2+}$  whereas  
24 the presence of  $\text{Na}^+$  has a positive effect on the assembly of shorter polysaccharide  
25 chains. Considering the observed morphology of the aerosol particles that are built up  
26 by marine gel matter a high content of  $\text{Ca}^{2+}/\text{Mg}^{2+}$  could facilitate the formation of  
27 fluffy and less compact “*mucus-like*” gel matter whereas the presence of  $\text{Na}^+/\text{K}^+$   
28 favoured a more compact structure of type “*aggregate*” and SP.

29 Halo particles with a center of gel or fraction of a gel showed a high content of  
30  $\text{Na}^+/\text{K}^+$ : 50% of the particles contained those metals exclusively whereas another 25%  
31 contained mainly  $\text{Na}^+/\text{K}^+$  with smaller amounts of  $\text{Ca}^{2+}/\text{Mg}^{2+}$  (Fig. 12). The high  
32 content of alkali metal ions in those particles suggested that they originated from SP  
33 or fragmented “*aggregate*” particles, which were exposed to processes that lead to  
34 condensational growth of the original gel particles.

35

## 1 4 Summary and conclusions

2 Aerosol particles collected in the summer high Arctic north of 80° were individually  
3 and objectively investigated with electron microscopy and subsequent image mapping.  
4 This enabled a division of the aerosol particles into three size resolved gross  
5 morphological groups, single particles (SP), gel particles (GP) and halo particles (HP).  
6 Single particles (SP) dominated the aerosol population in terms of numbers and made  
7 up 82% of all particles; they were observed over the whole sub-micrometer size range  
8 and clearly dominated the Aitken mode. The majority of SP (65%) was stable under  
9 the electron microscope and showed no signs of evaporation or morphological  
10 changes during imaging. These particles with refractory properties appeared over the  
11 whole size range of particles observed whereas the remaining 35% of SP appeared to  
12 be heat instable, evaporated partly and were predominantly observed in the  
13 accumulation mode. GP were observed at diameters > 45 nm predominantly in the  
14 accumulation mode with a maximum in number at 154 nm and contributed with 11%  
15 to the total particle number. The GP exhibited various morphological features and  
16 appeared as “*aggregate*” particles (14%) and as “*aggregate with film*” particles  
17 (29%) but the majority, 59% was made up by “*mucus-like*” particles. 70% of the GP  
18 in our study appeared to be smaller than 100 nm in diameter, and 90% were smaller  
19 than 200 nm.

20 HP appeared mainly in the accumulation mode at diameters > 60 nm with a maximum  
21 in number at 161 nm and contributed up to 7% to the total particle number mapped.  
22 The majority of HP consisted of heat instable particles, probably ammonium bisulfate  
23 (59% of all particles), internally mixed with sulfur containing compounds (sulfuric  
24 acid, ammonium bisulfate, methane sulfonic acid). The remaining fraction was made  
25 up by “*aggregate*” particles (19%) and decomposed or fragmented gel matter (22%)  
26 internally mixed with sulfur containing compounds.

27 Electron dispersive X-ray (EDX) spectroscopy revealed a gradual transition in the  
28 content of Na<sup>+</sup>/K and Ca<sup>2+</sup>/Mg<sup>2+</sup> between different particle morphologies. SP and  
29 “*aggregate*” particles preferentially contained Na<sup>+</sup>/K<sup>+</sup> whereas “*aggregate with film*”  
30 particles and “*mucus-like*” particles contained mainly Ca<sup>2+</sup>/Mg<sup>2+</sup> with minor contents  
31 of Na<sup>+</sup>/K<sup>+</sup>. Supported by model studies (Li et al., 2013; Sun et al., 2014) we  
32 hypothesize that a correlation exists between particle morphology and the prevalence  
33 of the ions Na<sup>+</sup>/K<sup>+</sup> and/or Ca<sup>2+</sup>/Mg<sup>2+</sup> where the prevalence of Ca<sup>2+</sup>/Mg<sup>2+</sup> facilitates the  
34 formation of large organic assemblies of GP type whereas a lack of Ca<sup>2+</sup>/Mg<sup>2+</sup> and a

1 prevalence of  $\text{Na}^+/\text{K}^+$  prohibit the formation of large assemblies leading to smaller  
2 entities of SP type.

3 The so far generally insufficient understanding of the size resolved aerosol  
4 composition and especially the role of organic compounds, their morphology and state  
5 of mixture had hampered a detailed understanding of the of the processes that lead to  
6 the activation of the high Arctic aerosol particles and thus their role in the formation  
7 of cloud droplets (Leck and Svensson, 2015; Martin et al., 2011; Zhou et al., 2001;  
8 Leck et al., 2002). One evident outcome from this study is that the aerosol particles to  
9 be activated into cloud droplets over the Arctic pack ice areas cannot be seen as  
10 simply inorganic salts. None of the aerosol particles showed an apparently cubic or  
11 otherwise crystalline appearance that could be attributed to sea salt particles. Instead  
12 the results from this study clearly show that organic marine gel matter significantly  
13 contributes to the particle number concentration over the whole sub-micrometer size  
14 range but especially at diameters below 60 nm.

15 A parallel study conducted during the ASCOS campaign (Orellana et al., 2011)  
16 demonstrated that airborne aerosol particles contain hydrophobic moieties on their  
17 surface that play an important role for gel formation (Maitra et al., 2001) and increase  
18 the rate of gel assembly (Ding et al., 2008). The interaction of the hydrophilic and  
19 hydrophobic entities on the structure of the polymer gels likely will influence the  
20 water vapor pressure and decrease the surface tension of the cloud droplets to be  
21 formed (Leck and Svensson, 2015; Ovadnevaite et al., 2011).

22 Water-soluble particles like ammonium sulfate were present mainly in the  
23 accumulation mode at diameters above 100 nm. Growth of the sub-Aitken particles  
24 probably resulted from deposition of acids/organic vapors on polymer gel particles  
25 and produced HP or sulfur containing particles with hygroscopic properties typical for  
26 a gel nucleus covered by a sulfate-methane sulfonate-ammonium complex. At the  
27 same time the fragmentation of larger particles is capable of adding numbers into the  
28 Aitken mode (Leck and Bigg, 1999; 2010; Karl et al., 2013). Orellana and Verdugo  
29 (2003) and Orellana et al. (2011) observed the sensitivity of marine gels to changes in  
30 the physicochemical environment (pH and T) and the fragmentation of gel matter into  
31 smaller entities as a result to UV radiation exposure. Acidic compounds typically  
32 found in the marine atmosphere like sulfuric acid and dimethyl sulfide (DMS)  
33 induced volume collapse of the swollen hydrated polymer gel network into a  
34 condensed and more compact form (Tanaka et al., 1980; Leck and Bigg, 2010;

1 Orellana et al., 2011). Condensation of sulfur acidic compounds and in-cloud  
2 processing of the marine gels in the atmosphere during their passage over the pack-ice  
3 and continuous exposure to UV radiation due to the length of the polar day in summer  
4 could produce smaller sized fragments of marine gels similar to the spherical subunits  
5 observed in “*aggregate*”/“*aggregate with film*” particles and the dense inclusions in  
6 “*mucus-like*” particles. Since SP showed a maximum in number concentration in the  
7 same size range, at 27 nm, it cannot be excluded that fragmentation of gel matter or  
8 pH induced collapse of the gels lead to the formation of smaller entities and by that  
9 providing a mechanism to produce SP and to add particle numbers to the Aitken mode.  
10 In hope of enhancing our understanding on CCN properties promoting /suppressing  
11 cloud droplet formation over the pack ice area in summer and at the same time meet  
12 the demand for observational data for the evaluation of climate models, this study has  
13 presented critical size resolved data on particle morphology, chemical composition  
14 and state of mixture based on the analysis of individual particles.

15  
16  
17

1 **Acknowledgements**

2 This work is part of the ASCOS (Arctic Summer Cloud Ocean Study). ASCOS was  
3 an IPY project under the AICIA-IPY umbrella and an endorsed SOLAS project.  
4 ASCOS was made possible by funding from the Knut and Alice Wallenberg  
5 Foundation, the DAMOCLES Integrated Research Project from the European Union  
6 6th Framework Program and the Swedish National Research Council (VR). The  
7 Swedish Polar Research Secretariat provided access to the icebreaker Oden and  
8 logistical support. The authors thank A. Held for collecting the aerosol particles  
9 during ASCOS, and A. Öhrström and C. Rauschenberg for their help with sample  
10 imaging / EDX measurements.  
11

## 1 **References**

- 2 Albrecht, B.: Aerosols, cloud microphysics and fractional cloudiness, *Nature*, 367,  
3 445-447, 1994.
- 4 Allen, T.: *Particle Size Measurement: Volume 1*, Chapman & Hall, London, 1997.
- 5 Ayers, G. P.: Quantitative determination of sulfate in individual aerosol particles,  
6 *Atmos. Environ.* 12, 1613-1621, 1978.
- 7 Barnard, W. R., Andreae, M. O. and Iverson, R. L.: Dimethylsulfide and *Phaeocystis*  
8 *pouchetii* in the southeastern Bering Sea, *Cont. shelf Res.*, 3, 103-113, 1984.
- 9 Bates, T. S., Cline, J. D., Gammon, R. H., and Kelly-Hansen, S. R.: Regional and  
10 seasonal variations in the flux of oceanic dimethylsulfide to the atmosphere, *J.*  
11 *Geophys. Res.*, 92(C3), 2930-2938, doi: 10.1029/JC092iC03p02930, 1987.
- 12 Bigg, E. K. and Leck, C.: Cloud-active particles over the central Arctic Ocean, *J.*  
13 *Geophys. Res.*, 106, 32155-32166, doi: 10.1029/1999JD901152, 2001a.
- 14 Bigg, E.K. and Leck, C.: Properties of the aerosol over the central Arctic Ocean, *J.*  
15 *Geophys. Res.*, 106:D23, 32101-32109, doi: 10.1029/1999JD901136, 2001b.
- 16 Bigg, E. K., and Leck, C.: The composition of fragments of bubbles bursting at the  
17 ocean surface, *J. Geophys. Res.* 113(D11209), doi 10.1029/2007JD009078, 2008.
- 18 Bigg, E. K., Ono, A. and Williams, J. A.: Chemical tests for individual submicron  
19 aerosol particles, *Atmos. Environ.*, 8, 1-13, 1974.
- 20 Bigg, E. K., Leck, C. and Nilsson, E. D.: Sudden changes in arctic atmospheric  
21 aerosol concentrations during summer and autumn, *Tellus B*, 48, 254-271,  
22 doi: 10.1034/j.1600-0889.1996.t01-1-00009.x, 1996.
- 23 Bigg, E. K., Leck, C. and Tranvik, L.: Particulates of the surface microlayer of open  
24 water in the central Arctic Ocean in summer, *Mar. Chem.*, 91, 131-141, 2004.
- 25 Busek, P. R. and Pósfai, M.: Airborne minerals and related aerosol particles: effects  
26 on climate and the environment, *Proc. Natl. Acad. Sci. USA*, 96, 3372-3379, 1999.
- 27 Capaldo, K. P. and Pandis, S. N.: Dimethylsulfide chemistry in the remote marine  
28 atmosphere: Evaluation and sensitivity analysis of available mechanisms, *J. Geophys.*  
29 *Res.*, 102, 23251-23267, 1997.
- 30 Carslaw, K. S., Lee, A., Reddington, C. L., Pringle, K. J., Rap, A., Forster, P. M.,  
31 Mann, G. W., Spracklen, D. V., Woodhouse, M. T., Regayre, L. A., and Pierce, J. R.:

1 Large contribution of natural aerosols to uncertainty in indirect forcing, *Nature*, 503,  
2 67-71, doi: 10.1038/nature12674, 2013.

3 Chi J. W., Li, W. J., Zhang D. Z., Lin Y. T., Shen X. J., Sun J. Y., Chen J. M., Zhang  
4 X. Y., Zhang Y. M., and Wang W. X.: Sea salt aerosols as a reactive surface for  
5 inorganic and organic acidic gases in the arctic troposphere, *Atmos. Chem. Phys.*  
6 *Discus.*,15, 16715-16745, doi: 10.5194/acpd-15-16715-2015, 2015.

7 Chin, W.-C., Orellana, M. V. and Verdugo, P.: Spontaneous assembly of marine  
8 dissolved organic matter into polymer gels, *Nature*, 391, 568-572, 1998.

9 Covert, D. S., Wiedensohler, A., Aalto, P., Heintzenberg, J., McMurry, P. H., and  
10 Leck, C.: Aerosol number size distributions from 3 to 500 nm diameter in the arctic  
11 marine boundary layer during summer and autumn, *Tellus*, 48B, 197-212, 1996.

12 Decho, A. W.: Microbial exopolymer secretions in ocean environments – their role(s)  
13 in food webs and marine processes, *Oceanogr. Mar. Biol. Ann. Rev.*, 28, 73-153,  
14 1990.

15 Ding, Y.-X., Chin, W.-C., Rodriguez, A., Hung, C.-C., Santschi, P. H. and Verdugo,  
16 P.: Amphiphilic exopolymers from *Sagittula stellata* induce DOM self-assembly and  
17 formation of marine microgels, *Mar. Chem.*, 112, 11-19, 2008.

18 Dixkens, J. and Fissan, H.: Development of an Electrostatic Precipitator for Off-Line  
19 Particle Analysis, *Aerosol. Sci. Tech.*, 30, 438–453, 1999.

20 Douglas, T., and Sturm, M.: Arctic haze, mercury and the chemical composition of  
21 snow across northwestern Alaska, *Atmos. Environm.* 38, 805–820, 2004.

22 Egerton, R. F.: *Physical Principles of Electron Microscopy*, Springer, New York,  
23 USA, 2008.

24 Engvall, A.-C., Krejci, R., Ström, J., Treffeisen, R., Scheele, R., Hermansen, O. and  
25 Paatero, J.: Changes in aerosol properties during spring-summer period in the Arctic  
26 troposphere, *Atmos. Chem. Phys.* 8, 445-462, doi:10.5194/acp-8-445-2008, 2008.

27 Ferek, R. J., Lazrus, A. L. and Winchester, W.: Electron microscopy of acidic  
28 aerosols collected over the northeastern United States, *Atmos. Environ.*, 17:8, 1545-  
29 1561, 1983.

30 Fitzgerald, J. W.: Marine aerosols: a review, *Atmos. Environ.*, 25A:3/4, 533-545,  
31 1991.



1 Forster, P., Ramaswamy, V., Artaxo, P., Berntsen, T., Betts, R., Fahey, D. W.,  
2 Haywood, J., Lean, J., Lowe, D. C., Myhre, G., Nganga, J., Prinn, R., Raga, G.,  
3 Schulz, M., and Van Dorland, R.: Changes in atmospheric constituents and in  
4 radiative forcing, in: *Climate Change 2007: The Physical Science Basis. Contribution*  
5 *of Working Group I to the Fourth Assessment Report of the Intergovernmental Panel*  
6 *on Climate Change*, edited by: Solomon, S., Qin, D., Manning, M., Chen, Z.,  
7 Marquis, M., Averyt, K. B., Tignor, M., and Miller, H. L., Cambridge University  
8 Press, Cambridge, United Kingdom and New York, NY, USA, 2007.

9 Geng, H., Ryu, J., Jung, H.-J., Chung, H., Ahn, K.-H. and Ro, C.-U.: Single-Particle  
10 Characterization of Summertime Arctic Aerosols Collected at Ny-Alesund, Svalbard,  
11 *Environmental Science & Technology*, 44(7), 2348-2353, 2010.

12 Hamacher-Barth, E., Jansson, K., and Leck, C.: A method for sizing submicrometer  
13 particles in air collected on Formvar films and imaged by scanning electron  
14 microscopy, *Atmos. Meas. Tech.*, 6, 3459-3475, 2013, doi: 10.5194/amt-6-3459-  
15 2013.

16 Hara, K., Yamagata, S., Yamanouchi, T., K. Sato, K., Herber, A., Iwasaka, Y.,  
17 Nagatani, M. and Nakata, H.: Mixing states of individual aerosol particles in spring  
18 Arctic troposphere during ASTAR 2000 campaign, *Journal of Geophysical Research-*  
19 *Atmospheres*, 108(D7), 4209, 2003.

20 Heard, M. J. and Wiffen, R. D.: Electron microscopy of natural aerosols and the  
21 identification of particulate ammonium sulfate, *Atm. Environm.*, 3:3, 337-340, 1969.

22 Heintzenberg, J. and Leck, C.: Seasonal variations of the atmospheric aerosol near the  
23 top of the marine boundary layer over Spitsbergen related to the Arctic sulfur cycle,  
24 *Tellus*, 46B, 52-67, 1994.

25 Heintzenberg, J., and Leck, C.: The summer aerosol in the central Arctic 1991-2008:  
26 did it change or not?, *Atmos. Chem. Phys.*, 12, 3969-3983, 2012.

27 Heintzenberg, J., Leck, C., Birmili, W., Wehner, B., Tjernström, M. and  
28 Wiedensohler, A.: Aerosol number-size distributions during clear and fog periods in  
29 the summer high Arctic: 1991, 1996 and 2001, *Tellus*, 58B, 41-50, doi:  
30 10.1111/j.1600-0889.2005.00171.x, 2006.

1 Heintzenberg, J., Leck, C. and Tunved, P.: Potential source regions and processes in  
2 the summer Arctic, *Atmos. Chem. Phys.*, 15, 6487-6502, doi:10.5194/acp-15-6487-  
3 2015, 2015.

4 Held, A., Brooks, I. M., Leck, C., and Tjernström, M.: On the potential contribution  
5 of open lead particle emissions to the central Arctic aerosol concentration, *Atmos.*  
6 *Chem. Phys.*, 11(7), 3093-3105, 2011a.

7 Held, A., Orsini, D. A., Vaattovaara, P., Tjernström, M., and Leck, C.: Near-surface  
8 profiles of aerosol number concentration and temperature over the Arctic Ocean,  
9 *Atmos. Meas. Tech.*, 4, 1603–1616, 2011b.

10 Hillamo, R., Kerminen, V.-M., Aurela, M., Mäkelä, T., Maenhaut, W., and Leck, C.:  
11 Modal structure of chemical mass size distribution in the high Arctic aerosol, *J.*  
12 *Geophys. Res.*, 106(D21), 27555-27571, doi: 10.1029/2001JD001119, 2001.

13 Hinds, W.: *Aerosol Technology*, 2nd ed., John Wiley & Sons, New York, 1999.

14 Hoppel, W. A., Frick, G. M., and Larson, R. E.: Effect of nonprecipitating clouds on  
15 the aerosol size distribution in the marine boundary layer, *Geophys. Res. Lett.*, 13,  
16 125-128, 1986.

17 Karl, M., Leck, C., Coz, E. and Heintzenberg, J.: Marine nanogels as a source of  
18 atmospheric nanoparticles in the high Arctic, *Geophys. Res. Lett.*, 40:14, 3738-3743,  
19 2013.

20 Kettle, A. J., Andreae, M. O., Amouroux, D., Andreae, T. W., Bates, T. S.,  
21 Berresheim, H., Bingemer, H., Boniforti, R., Curran, M. A. J., DiTullio, G. R., Helas,  
22 G., Jones, G. B., Keller, M. D., Kiene, R. P., Leck, C., Lévassieur, M., Maspero, M.,  
23 Matrai, P., McTaggart, A. R., Mihalopoulos, N., Nguyen, B. C., Novo, A., Putaud, J.  
24 P., Rapsomanikis, S., Roberts, G., Schebeske, G., Sharma, S., Simo, R., Staubes, R.,  
25 Turner, S., Uher, G.: A global database of sea surface dimethylsulphide (DMS)  
26 measurements and a simple model to predict sea surface DMS as a function of  
27 latitude, longitude and month, *Global Biogeochem. Cy.* 13, 399-444, 1999.

28 Korhonen, H., Carslaw, K. S., Spracklen, D. V., Ridley, D. A. and Ström, J.: A global  
29 model study of processes controlling aerosol size distributions in the Arctic spring and  
30 summer, *J. Geophys. Res.*, 113, D08211-D08211, doi: 10.1029/2007JD009114, 2008.

1 Krembs, C., Eicken, H., Junge, K. and Deming, J. W.: High concentrations of  
2 exopolymeric substances in Arctic winter sea ice: implications for the polar ocean  
3 carbon cycle and cryoprotection of diatoms, *Deep Sea Res. I*, 49, 2163-2181, 2002.

4 Kuhn, T., Damoah, R., Bacak, A., and Sloan, J. J.: Characterising aerosol transport  
5 into the Canadian High Arctic using aerosol mass spectrometry and Lagrangian  
6 modelling, *Atmos. Chem. Phys.*, 10(21), 10489-10505, doi:10.5194/acp-10-10489-  
7 2010, 2010.

8 Lannefors, H., Heintzenberg, J., and Hansson, H.-C.: A comprehensive study of  
9 physical and chemical parameters of the Arctic summer aerosol; results from the  
10 Swedish expedition Ymer-80, *Tellus*, 35B, 40-54, 1983.

11 Leck, C. and Svensson, E.: Importance of aerosol composition and mixing state for  
12 cloud droplet activation over the Arctic pack ice in summer, *Atmos. Chem. Phys.*,  
13 15(5), 2545-2568, doi:10.5194/acp-15-2545-2015, 2015.

14 Leck, C. and Bigg, E. K.: Evolution of marine aerosol – a new perspective, *Geophys.*  
15 *Res. Lett.*, 32, L19803, doi: 10.1029/2005GL023651, 2005a.

16 Leck, C. and Bigg, E. K.: Biogenic particles in the surface microlayer and overlaying  
17 atmosphere in the central Arctic Ocean during summer, *Tellus B*, 57, 305-316, doi:  
18 10.1111/j.1600-0889.2005.00148.x, 2005b.

19 Leck, C. and Bigg, E. K.: Comparison of sources and nature of the tropical aerosol  
20 with the summer high Arctic aerosol, *Tellus*, 60B, 118-126, 2008.

21 Leck, C. and Bigg, E. K.: New particle formation of marine biological origin, *Aerosol*  
22 *Sci. Tech.*, 44(7), 570-577, 2010.

23 Leck, C. and Nilsson, D. E.: A pseudo-Lagrangian study of the sulfur budget in the  
24 remote Arctic marine boundary layer, *Tellus*, 54B, 213-230, 2002.

25 Leck, C., Bigg, E. K., Covert, D. S., Heintzenberg, J., Maenhaut, W., Nilsson, E. D.,  
26 and Wiedensohler, A.: Overview of the atmospheric research program during the  
27 International Arctic Ocean Expedition 1991 (IAOE-91) and its scientific results,  
28 *Tellus*, 48B, 136-155, 1996.

29 Leck, C., Nilsson, E. D., Bigg, E. K. and Bäcklin, L.: The atmospheric program of the  
30 Arctic Ocean Expedition 1996 (AOE-96): An overview of scientific goals,  
31 experimental approach, and instruments, *J. Geophys. Res.*, 106, 32051-32067, 2001.

1 Leck, C., Tjernström, M., Matrai, P., Swietlicki, E. and Bigg, E. K.: Can marine  
2 micro-organisms influence melting of the Arctic pack ice?, *EOS*, 85, 25-36, 2004.

3 Leck, C., Gao, Q., Mashayekhy Rad, F. and Nilsson, U.: Size resolved atmospheric  
4 particulate polysaccharides in the high summer Arctic, *Atmos. Chem. Phys.*, 13,  
5 12573-12588, doi: 10.5194/acp-13-12573-2013, 2013.

6 Leck, C., Norman, M., Bigg, E. K., and Hillamo, R.: Chemical composition and  
7 sources of the high Arctic aerosol relevant for cloud formation, *J. Geophys. Res.*  
8 107(D12), 4135-4153, doi: 10.1029/2001JD001463, 2002.

9 Lee, L. A., Pringle, K. J., Reddington, C. L., Mann, G. M., Stier, P., Spracklen, D. V.,  
10 Pierce, J. R. and Carslow, K. D.: The magnitude and causes of uncertainty in global  
11 model simulations of cloud condensation nuclei, *Atmos. Chem. Phys.* 13, 8879-8914,  
12 2013.

13 Li, X., Leck, C., Sun, L., Hede, T., Tu, Y., and Ågren, H.: Cross-linked  
14 polysaccharide assemblies in marine gels: an atomistic simulation, *J. Phys. Chem.*  
15 *Lett.*, 4, 2637-2642, doi: 10.1021/jz401276r, 2013.

16 Lohmann, U. and Leck, C.: Importance of submicron surface-active organic aerosols  
17 for pristine Arctic clouds, *Tellus*, 57B, 261-268, 2005.

18 Maitra, U., Mukhopadhyay, S., Sarkar, A., Rao, P., Indi, S. S.: Hydrophobic pockets in  
19 a nonpolymeric aqueous gel: observation of such a gelation process by color change,  
20 *Angew. Chem. Int. ed.* 40, 2281-2283, 2001.

21 Mancuso-Nichols, C. A., Guezennec, J. and Bowman, J. P.: Bacterial  
22 exopolysaccharides from extreme marine environments, with special consideration of  
23 the Southern Ocean, sea ice and hydrothermal vents: a review, *J. Appl. Microbiol.*, 96,  
24 1057-1066, 2005.

25 Mann, G. W., Carslaw, K. S., Reddington, C. L., Pringle, K. J., Schulz, M., Asmi, A.,  
26 Spracklen, D. V., Ridley, D. A., Woodhouse, M. T., Lee, L. A., Zhang, K., Ghan, S.  
27 J., Easter, R. C., Liu, X., Stier, P., Lee, Y. H., Adams, P. J., Tost, H., Lelieveld, J.,  
28 Bauer, S. E., Tsigaridis, K., van Noije, T. P. C., Strunk, A., Vignati, E., Bellouin, N.,  
29 Dalvi, M., Johnson, C. E., Bergman, T., Kokkola, H., von Salzen, K., Yu, F., Luo, G.,  
30 Petzold, A., Heintzenberg, J., Clarke, A., Ogren, J. A., Gras, J., Baltensperger, U.,  
31 Kaminski, U., Jennings, S. G., O'Dowd, C. D., Harrison, R. M., Beddows, D. C. S.,  
32 Kulmala, M., Viisanen, Y., Ulevicius, V., Mihalopoulos, N., Zdimal, V., Fiebig, M.,

1 Hansson, H.-C., E. Swietlicki, and Henzing, J. S.: Intercomparison and evaluation of  
2 global aerosol microphysical properties among AeroCom models of a range of  
3 complexity, *Atmos. Chem. Phys.*, 14, 4679-4713, doi: 10.5194/acp-14-4679-2014,  
4 2014.

5 Martin, M., Chang, R. Y.-W., Sierau, B., Sjogren, S., Swietlicki, E., Abbatt, J. P. D.,  
6 Leck, C. and Lohmann, U.: Cloud condensation nuclei closure study on summer arctic  
7 aerosol, *Atmos. Chem. Phys.*, 11, 11335-11350, doi: 10.5194/acp-11-11335-2011,  
8 2011.

9 Mauritsen, T., Sedlar, J., Tjernström, M., Leck, C., Martin, M., Shupe, M., Sjogren,  
10 S., Sierau, B., Persson, P. O. G., Brooks, I. M., and Swietlicki, E.: An Arctic CCN-  
11 limited cloud-aerosol regime, *Atmos. Chem. Phys.* 11, 165-173, doi: 10.5194/acp-11-  
12 165-2011, 2011.

13 Michael, J. R., Joy, D. C., and Griffin, B. J.: Use of sample bias voltage for low-  
14 energy high-resolution imaging in the SEM, *Microsc. Microanal.*, 16 (Suppl. 2), 614-  
15 615, doi: 10.1017/S1431927610055315, 2010.

16 Nilsson, D. E. and Leck, C.: A pseudo-Lagrangian study of the sulfur budget in the  
17 remote Arctic marine boundary layer, *Tellus*, 54(B), 213-230, 2002.

18 Okada, K.: Nature of individual hygroscopic particles in the urban atmosphere, *J.*  
19 *Met. Soc. Jpn.*, 61(5), 727-735, 1983.

20 Orellana, M. V., Lessard, E. J., Dycus, E., Chin, W. C., Foy, M. S. and Verdugo, P.:  
21 Tracing the source and the fate of biopolymers in seawater: application of an  
22 immunological technique, *Mar. Chem.*, 83, 89-99, 2003.

23 Orellana, M. V., and Verdugo, P.: Ultraviolet radiation blocks the organic carbon  
24 exchange between the dissolved phase and the gel phase in the ocean, *Limnol.*  
25 *Oceanogr.*, 48, 1618-1623, 2003.

26 Orellana, M. V., Petersen, T. W., Diercks, A. H., Donohoe, S., Verdugo, P., van den  
27 Engh, E.: Marine microgels: optical and proteomic fingerprints, *Mar. Chem.*, 105,  
28 229-239, 2007.

29 Orellana, M. V., Matrai, P. A., Leck, C., Rauschenberg, C. D., Lee, A. M., and Coz,  
30 E.: Marine microgels as a source of cloud condensation nuclei in the high Arctic,  
31 *PNAS*, 108, 13612-13617, doi: 10.1073/pnas.1102457108, 2011.

1 Orellana, M. V., Pang, W. L., Durand, P. M., Whitehead, K., Baliga, N. S.: A role for  
2 programmed cell death in the microbial loop, *PLoS One* 8, e62595, 2013.

3 Ovadnevaite, J., Ceburnis, D., Martucci, G., Bialek, J., Monahan, C., Rinaldi, M.,  
4 Facchini, M. C., Berresheim, H., Worsnop, D. R., and O'Dowd, C.: Primary marine  
5 organic aerosol: A dichotomy of low hygroscopicity and high CCN activity, *Geophys.*  
6 *Res. Lett.*, 38, L21806, doi: 10.1029/2011GL048869, 2011.

7 Parungo, F. P., Nagamoto, C. T., Rosinski, J. and Haagenson, P. L.: Marine aerosol in  
8 Pacific upwelling regions, *J. Aerosol Sci.*, 18, 277-290, 1987.

9 Parungo, F. P., Nagamoto, C. T., Rosinski, J. and Haagenson, P. L.: A study of  
10 marine aerosols over the Pacific Ocean, *J. Atmos. Chem.*, 4, 199-226, 1986.

11 Penner, J. E., Andreae, M., Annegarn, H., Barrie, L., Feichter, J., Hegg, D.,  
12 Jayaraman, A., Leaitch, R., Murphy, D., Nganga, J., and Pitar, G.: Aerosols, their  
13 Direct and Indirect Effects, in: *Climate Change 2001: The Scientific Basis*,  
14 Contribution of Working Group I to the Third Assessment Report of the Intergovern-  
15 mental Panel on Climate Change, edited by: Houghton, J. T., Ding, Y., Griggs, D. J.,  
16 Noguer, M., van der Linden, P. J., Dai, X., Maskell, K., and Johnson, C. A.,  
17 Cambridge University Press, Cambridge, United Kingdom and New York, NY, USA,  
18 2001.

19 Quinn, P. K., Charlson, R. J. and Zoller, W. H.: Ammonia, the dominant base in the  
20 remote marine troposphere: a review, *Tellus*, 39B, 413-425, 1987.

21 Rao, K. V. R., Hariharan, P. L., Jagannathan, K., Yoganasimhan, S. R.: Scanning  
22 electron microscopy of ammonium nitrate prills in relation to their application in  
23 ammonium nitrate-fuel oil systems, *Fuel*, 68:9, 1118-1122, doi:10.1016/0016-  
24 2361(89)90181-6, 1989.

25 Rocha, S., Krastev, R., Thünemann, A. F., Pereira, M. C., Möhwald, H., and  
26 Bezesinski, G.: Adsorption of amyloid  $\beta$ -peptide at polymer surfaces: a neutron  
27 reflectivity study, *Chem. Phys. Chem.*, 6, 2527-2534, doi: 10.1002/cpc.200500158,  
28 2005.

29 Schimel, D., Alves, D., Enting, I., Heimann, M., Joos, F., Raynaud, D., Wigley, T.,  
30 Prather, M., Derwent, R., Ehhalt, D., Fraser, P., Sanhueza, E., Zhou, X., Jonas, P.,  
31 Charlson, R., Rodhe, H., Sadasivan, S., Shine, K. P., Fouquart, Y., **Ramaswamy**, V.,  
32 Solomon, S., Srinivasan, J., Albritton, D., **Isaksen**, I., Lal, M., and Wuebbles, D.:

1 Radiative forcing of climate change, in: Climate Change 1996, Contribution of  
2 Working Group I to the 2nd Assessment Report of the **Intergovernmental** Panel on  
3 **Climate** Change, edited by: Houghton, J. T., Meira Filho, L. G., Callander, B. A.,  
4 Harris, N., Kattenberg, A., and Maskell, K., Cambridge University Press, Cambridge,  
5 United Kingdom and New York, NY, USA, 1996.

6 Shaw, G. E.: Biocontrolled thermostasis involving the sulfur cycle, *Clim. Change*, 5,  
7 297-303, 1983.

8 Shaw, G. E.: Microparticle size spectrum of Arctic haze, *Geophys. Res. Lett.*, 11:5,  
9 409-412, 1984.

10 Shaw, G. E.: The arctic haze phenomenon, *Bull. Am. Met. Soc.*, 76:12, 2403-2413,  
11 1995.

12 Solomon, S., Quin, D., Manning, M., Chen, Z., Marquis, M., Averyt, K. B., Tignor,  
13 M., and Miller, H. L.: *Climate change 2007: The physical science basis*, Cambridge  
14 University Press, 996 pp., 2007.

15 Söderlund, R.: *Ammonia in the atmosphere*, PhD dissertation, University of  
16 Stockholm, Stockholm, Sweden, 1982.

17 Stevens, S. M., Jansson, K., Xiao, C., Asahina, S., Klingstedt, M., Grüner, D.,  
18 Sakamoto, Y., Keiichi, M., Cubillas, P., Brent, R., Han, L., Che, S., Ryoo, R., Zhao,  
19 D., Anderson, M., Schüth, F., and Terasaki, O.: An Appraisal of High Resolution  
20 Scanning Electron Microscopy to Porous Material, *JEOL news*, 44:1, 17-22, 2009.

21 Stohl, A.: Characteristics of atmospheric transport into the Arctic troposphere, *J.*  
22 *Geophys. Res.*, 111, D11306, doi:10.1029/2005JD006888, 2006.

23 Stolzenburg, M. R.: *An ultrafine aerosol size distribution measuring system*, Ph.D.  
24 Thesis, University of Minnesota, Minneapolis, USA, 1988.

25 Ström, J., Umegård, K., Tørseth, K., Tunved, P., Hansson, H.-C., Holmén, K.,  
26 Wismann, V., Herver, A. and König-Langlo, G.: One year of particle size distribution  
27 and aerosol chemical composition measurements at the Zeppelin station, Svalbard,  
28 March 2000-2001, *Phys. Chem. Earth*, 28, 1181-1190, 2003.

29 Sun, L., Li, X., Hede, T., Tu, Y., Leck, C., and Ågren, H.: Molecular dynamics  
30 simulations reveal the assembly mechanisms of polysaccharides in marine aerosols,  
31 *Phys. Chem. Chem. Phys.*, 16, 25935-25941, 2014.

1 Tanaka, T., Fillmore, D., Sun, S., Nishio, I., Wislow, G. S., Shah, A.: Phase  
2 transitions in ionic gels, *Phys. Rev. Lett.* 45, 1636-1642, 1980.

3 Tjernström, M., Leck, C., Birch, C. E., Bottenheim, W. E., Brooks, B. J., Brooks, I.  
4 M., Bäcklin, L., Chang, R. Y.-W., Granath, E., Graus, M., Hansel, A., Heintzenberg,  
5 J., Held, A., Hind, A., de la Rosa, S., Johnston, P., Knulst, J., de Leeuw, G., di  
6 Liberto, L., Martin, M., Matrai, P. A., Mauritsen, T., Müller, M., Norris, S. J.,  
7 Orellana, M. V., Orsini, D. A., Paatero, J., Persson, P. O. G., Gao, Q., Rauschenberg,  
8 C., Ristovski, Z., Sedlar, J., Shupe, M. D., Sireau, B., Sirevaag, A., Sjogren, S.,  
9 Stetzer, O., Swietlicki, E., Szczodrak, M., Vaattovaara, P., Wahlberg, N., Westberg,  
10 M., and Wheeler, C. R.: The Arctic Summer Cloud-Ocean Study (ASCOS): overview  
11 and experimental design, *Atmos. Chem. Phys.*, 14, 2823–2869, doi:10.5194/acp-14-  
12 2823-2014, 2014.

13 Twomey, S. A.: The influence of pollution on the shortwave albedo of clouds, *J.*  
14 *Atmos. Sci.*, 34, 1149-1152, 1977.

15 Verdugo, P.: Marine microgels, *Annu. Rev. Mar. Sci.*, 4, 375-400, 2012.

16 Verdugo, P., Alldredge, A. L., Azam, F., Kirchman, D. L., Passow, U., and Santschi,  
17 P. H.: The oceanic gel phase: a bridge in the DOM-POM continuum, *Mar. Chem.* 92,  
18 67-85, 2004.

19 Wiedensohler, A., Birmili, W., Nowak, A., Sonntag, A., Weinhold, K., Merkel, M.,  
20 Wehner, B., Tuch, T., Pfeifer, S., Fiebig, M., Fjåraa, A. M., Asmi, E., Sellegri, K.,  
21 Depuy, R., Venzac, H., Villani, P., Laj, P., Aalto, P., Ogren, J. A., Swietlicki, E.,  
22 Williams, P., Roldin, P., Quincey, P., Hüglin, C., Fierz-Schmidhauser, R., Gysel, M.,  
23 Weingartner, E., Riccobono, F., Santos, S., Gröning, C., Faloon, K., Beddows, D.,  
24 Harrison, R., Monahan, C., Jennings, S. G., O’Dowd, C. D., Marinoni, A., Horn, H.-  
25 G., Keck, L., Jiang, J., Scheckman, J., McMurry, P. H., Deng, Z., Zhao, C. S.,  
26 Moerman, M., Henzing, B., de Leeuw, G., Löschau, G., and Bastian, S.: Mobility  
27 particle size spectrometers: harmonization of technical standards and data structure to  
28 facilitate high quality long-term observations of atmospheric particle number size  
29 distributions, *Atmos. Meas. Tech.*, 5, 657–685, doi:10.5194/amt-5-657-2012, 2012.

30 Williams, D. B. and Carter, C. B.: *Transmission Electron Microscopy, A textbook for*  
31 *materials science, Part I: Transmission electron microscopy*, Springer Science +  
32 *Buisness Media*, New York, USA, p. 354 ff., 1996.



1 Winiger, P., Andersson, A., Yttri, K. E., Tunved, P., and Gustafsson, Ö.: Isotope-  
2 based source appointment of EC aerosol particles during winter high-pollution events  
3 at the Zeppelin Observatory, Svalbard, *Environ. Sci. Techol.*, 49, 11959-11966, doi:  
4 10.1021/acs.est.5b02644, 2015.

5 Xie, Z., Blum, J. D., Utsunomiya, S., Ewing, R. C., Wang, X., and Sun, L.:  
6 Summertime carbonaceous aerosols collected in the marine boundary layer of the  
7 Arctic Ocean, *Journal of Geophysical Research*, 112(D2), 2007.

8 Xin, L., Leck, C., Sun, L., Hede, T., Tu, Y. and Ågren, H.: Cross-linked  
9 polysaccharide assemblies in marine gels: an atomistic simulation, *J. Phys. Chem.*  
10 *Lett.*, 4, 2637-2642, doi: 10.1021/jz401276r, 2013.

11 Zhou, J., Swietlicki, E., Berg, O. H., Aalto, P. P., Hämeri, K., Nilsson, E. D. and  
12 Leck, C.: Hygroscopic properties of aerosol particles over the central Arctic Ocean  
13 during summer, *J. Geophys. Res.*, 106, 32111-32123, 2001.

14 Zhou, J., Mopper, K. and Passow, U.: The role of surface-active carbohydrates in the  
15 formation of transparent exopolymer particles by bubble adsorption of seawater,  
16 *Limnol. Oceanogr.*, 43, 1860-1871, 1998.

17 Zhou, W., Apkarian, R., Wang, Z. L., and Joy, D.: Fundamentals of scanning electron  
18 microscopy, in: *Scanning Microscopy for Nanotechnology - Techniques and*  
19 *Applications* [Zhou, W. and Wang, Z. L. (eds.)], Springer Business + Media, New  
20 York, 2006.

21  
22

1

|                                     | 15-80 nm      | 80-200 nm    | > 200 nm     | Sum<br>(% of total) |
|-------------------------------------|---------------|--------------|--------------|---------------------|
| Single particles<br>(% of total SP) | 2609<br>(80%) | 573<br>(18%) | 57<br>(2%)   | 3239<br>(82 %)      |
| Gel particles<br>(% of total GP)    | 97<br>(24%)   | 198<br>(49%) | 108<br>(27%) | 403<br>(11 %)       |
| Halo particles<br>(% of total HP)   | 9<br>(3%)     | 95<br>(36%)  | 163<br>(61%) | 267 (7 %)           |
| Total number of particles           |               |              |              | 3909 (100%)         |

2 Table 1. Numbers and percentage of total for single particles (SP), gel particles (GP)  
3 and halo particles (HP) imaged with SEM and used for calculating number size  
4 distributions.

5

1

|                                    | No Na <sup>+</sup> /K <sup>+</sup> ,<br>no Ca <sup>2+</sup> /Mg <sup>2+</sup> | Ca <sup>2+</sup> /Mg <sup>2+</sup> | Na <sup>+</sup> /K <sup>+</sup> | Ca <sup>2+</sup> /Mg <sup>2+</sup> and<br>Na <sup>+</sup> /K <sup>+</sup> |
|------------------------------------|-------------------------------------------------------------------------------|------------------------------------|---------------------------------|---------------------------------------------------------------------------|
| Single particles                   | 4 %                                                                           | 4 %                                | 13 %                            | 78 % (Na <sup>+</sup> /K <sup>+</sup> )                                   |
| “Aggregate” particles              | -                                                                             | -                                  | 20 %                            | 80 % (Na <sup>+</sup> /K <sup>+</sup> )                                   |
| “Aggregate with film”<br>particles | -                                                                             | 17 %                               | 17 %                            | 67% (Ca <sup>2+</sup> /Mg <sup>2+</sup> )                                 |
| “Mucus-like” particles             | -                                                                             | 11 %                               | 3 %                             | 86 % (Ca <sup>2+</sup> /Mg <sup>2+</sup> )                                |
| Halo particles                     | 25 %                                                                          | -                                  | 50 %                            | 25 % (Na <sup>+</sup> /K <sup>+</sup> )                                   |

Table 2. Fraction of particles containing the ions Na<sup>+</sup>/K<sup>+</sup> or Ca<sup>2+</sup>/Mg<sup>2+</sup>, or both, Na<sup>+</sup>/K<sup>+</sup> and Ca<sup>2+</sup>/Mg<sup>2+</sup>, or neither Na/K nor Ca<sup>2+</sup>/Mg<sup>2+</sup> in single particles, “aggregate” particles, “aggregate with film” particles, “mucus-like” particles and halo particles. The ions written in brackets in the last column indicate the prevalent type of ion in the respective type of particle.

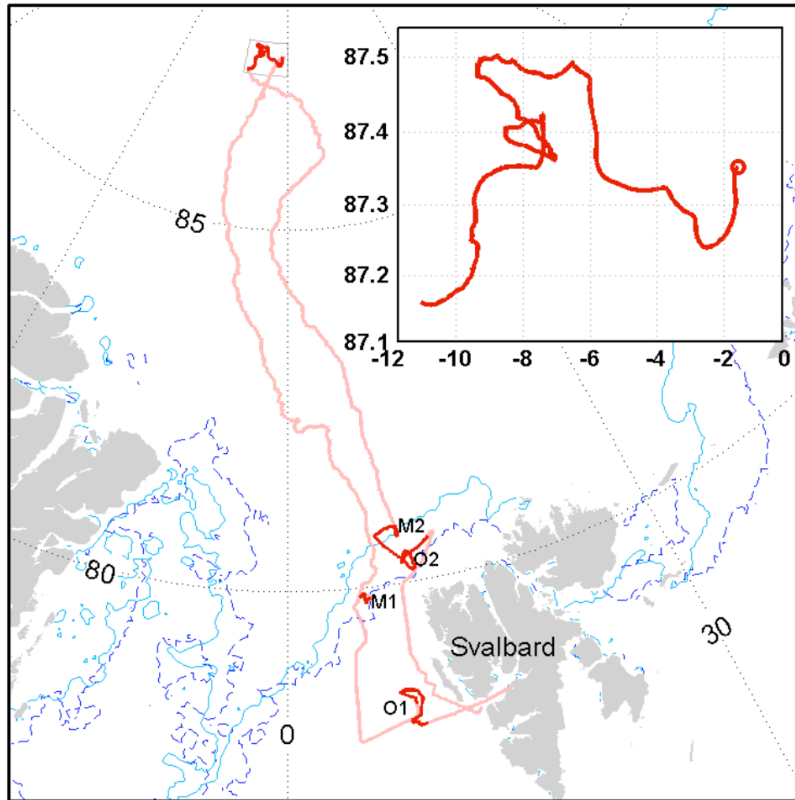

Figure 1. Track of the icebreaker *Oden* in the Arctic (pink). The path during the ice-drift is shown in the insert (red line); the circle indicates the start of the ice-drift, the ice edge (thin blue line) was passed on 12 August 2008.

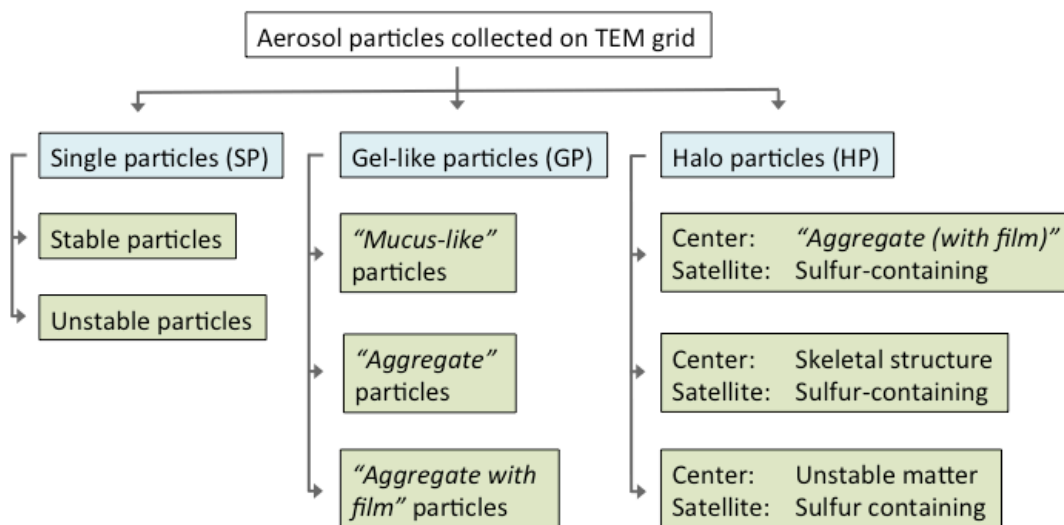

Figure 2. Scheme of the aerosol particle types collected on Formvar grid; the particles observed with SEM are shaded in light blue, particles observed in TEM are shaded in light green.

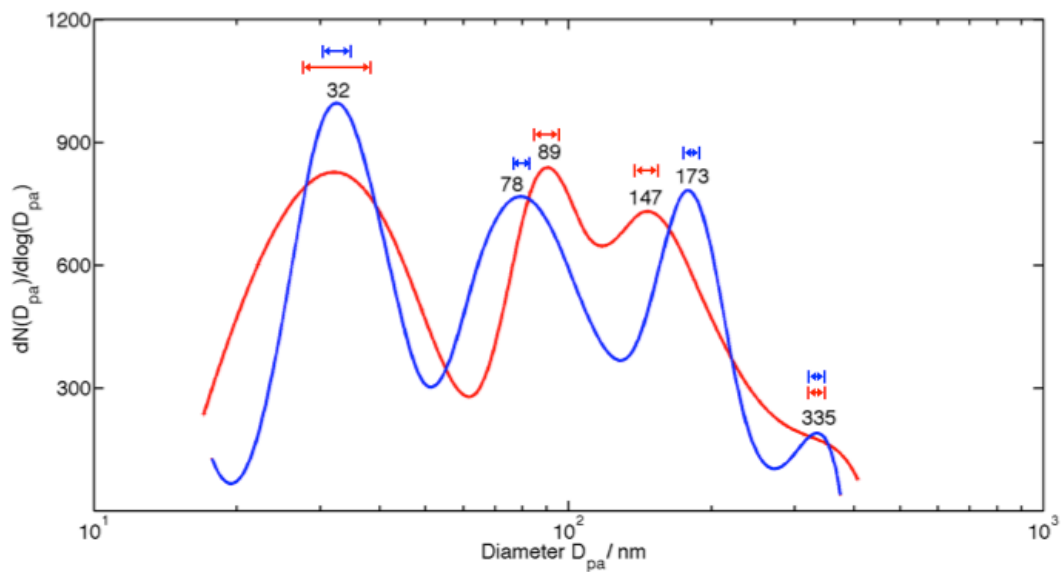

Figure 3. Number size distribution of the total aerosol collected for this study; red line: SEM derived particle number distribution, error bars represent the error size determination retrieved from calibration measurements described in Hamacher-Barth et al. (2013); blue line: number size distribution from simultaneous TDMPS measurements, errors bars represent 5 % uncertainty of the data (Wiedensohler et al., 2012).

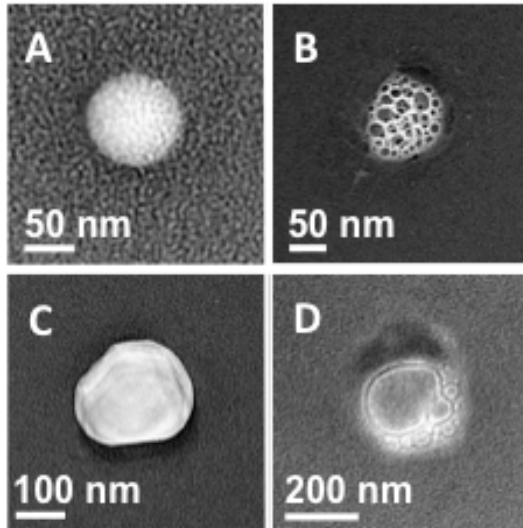

Figure 4. Examples for single particles (SP) observed with TEM. (A) a particle stable under the beam of the electron microscope. (B) particle with a skeletal structure. (C) a particle stable under the electron beam. (D) an example for a particle that is unstable under the electron beam.

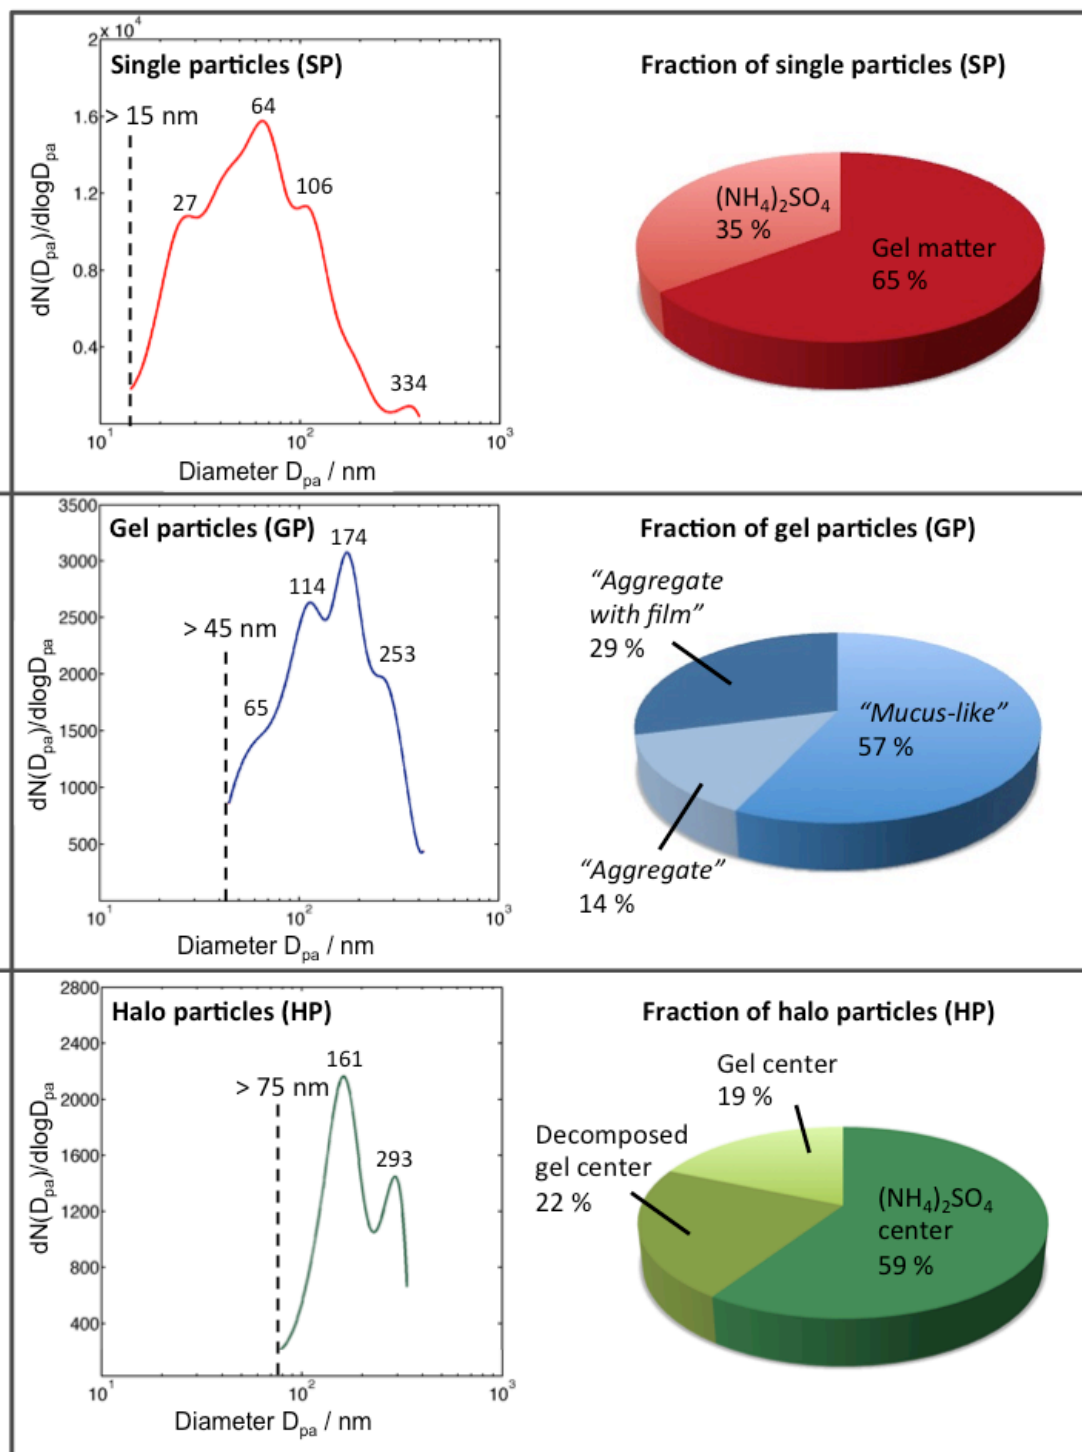

Figure 5. SEM number size distribution of the particle types (single particles, gel-like particles and halo particles) evaluated for this study (to the left) plus the fraction of the different subgroups of particles derived from TEM (to the right). The dashed line in each figure marks the lowest diameter at which the respective particle type appears.



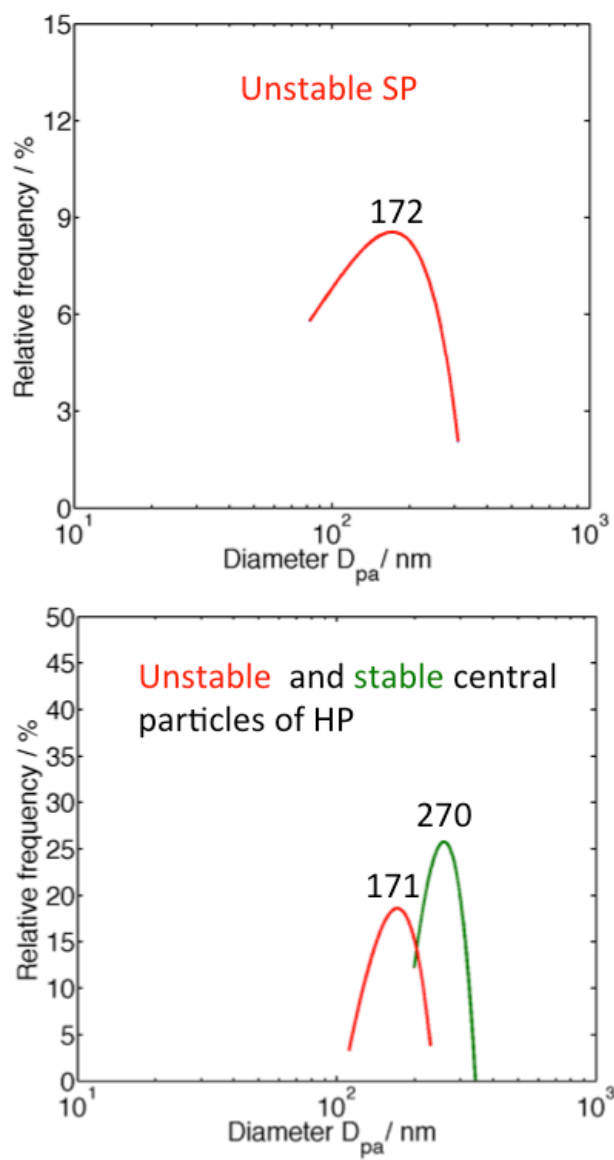

Figure 6. Number size distributions obtained from TEM images. Upper panel: **unstable** SP. Lower panel: central particles of HP; red line: **unstable** central particles, green line: stable central particles comprising “*aggregate*”, “*aggregate with film*” and skeletal particles.

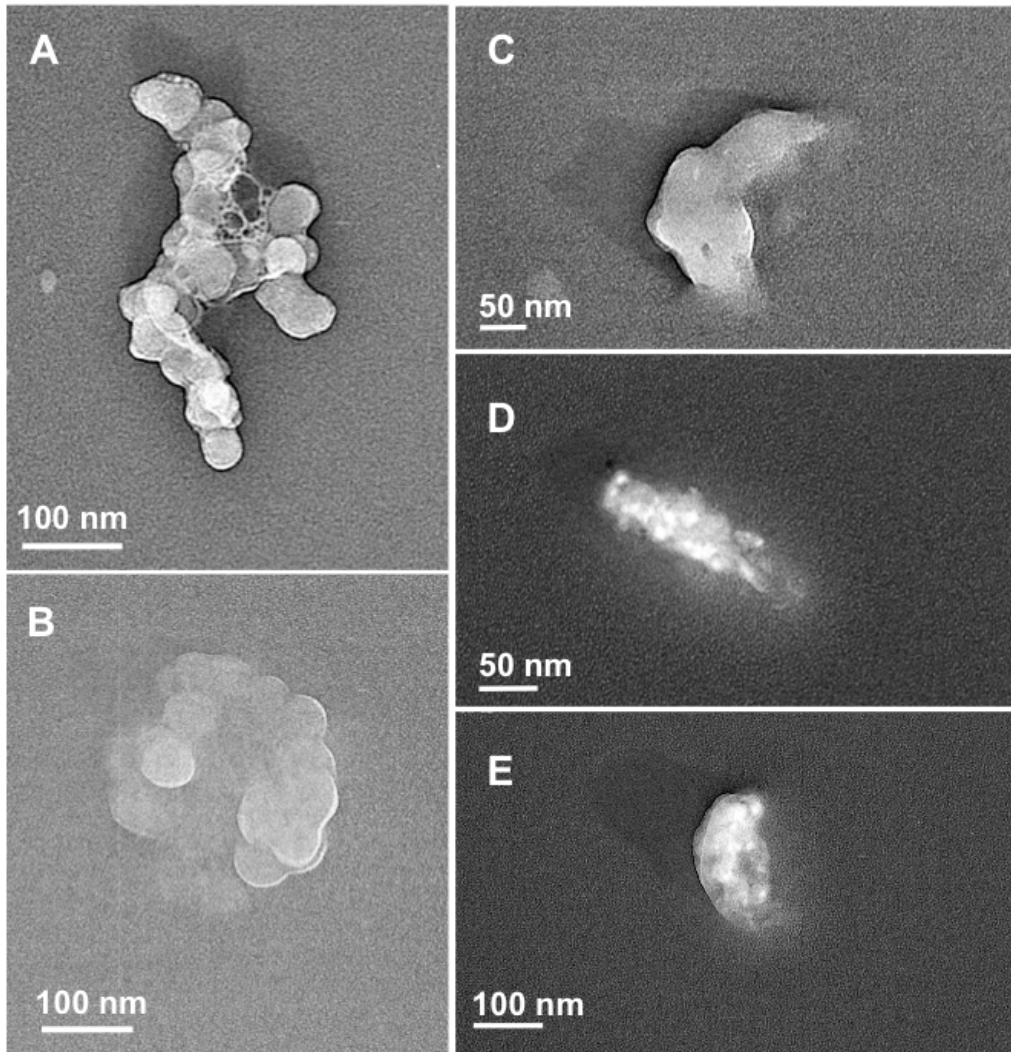

Figure 7. Examples for particles built up by aggregated subunits, observed with TEM. (A), (B) consist of pure aggregates (“*aggregate*” particles). (C), (D) and (E) aggregate particles covered with a thin film of gel (“*aggregate with film*” particles).

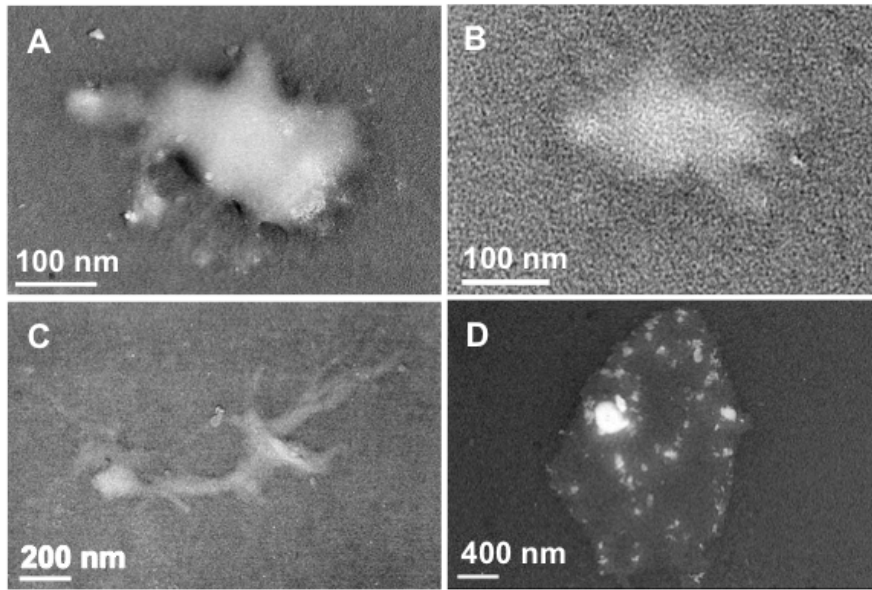

Figure 8. Examples for “*mucus-like*” particles observed with TEM. (A) mucus matter with small dense inclusions, partly outdrawn on the Formvar film. (B) mucus matter, outdrawn on the Formvar film. (C) mucus matter, extensively outdrawn on the formvar film. (D) mucus matter with numerous dense inclusions.

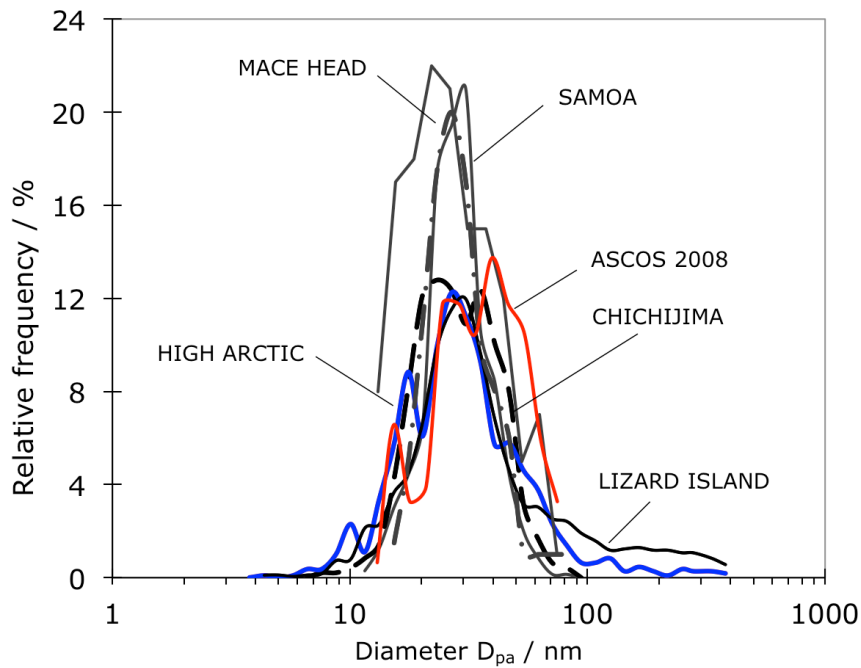

Figure 9. Number size distributions of airborne aggregate particles and their building blocks at different locations: Mace Head (53°N, 10°W), Lizard Island (14.6°S, 145.5 °E), American Samoa (14 °S, 172 °W), Chichijima (27 °N, 142 °E), High Arctic (AOE-2001, between 88.9 °N and 88.2 °N; blue line), and ASCOS 2008 (between 87 °N, 1°W and 87 °N, 11 °W, red line). All particles were assumed to be spherical in shape (from Bigg and Leck (2008), modified).

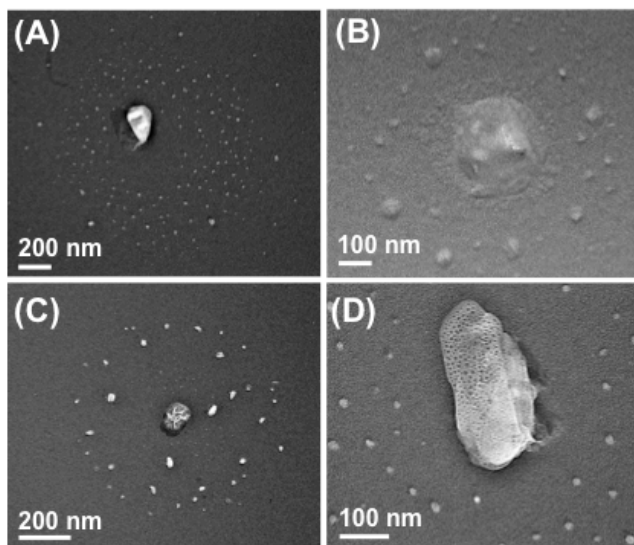

Figure 10. Examples for Halo Particles observed with TEM. (A) a central “*aggregate*” particle surrounded by satellite particles of sulfuric acid and a smaller amount of methane sulfonic acid. (B) central “*aggregate with film*” particles, surrounded by satellite particles of sulfuric acid and methane sulfonic acid. (C) central particle formed by ammonium sulfate, satellite particles formed by methane sulfonic acid, probably mixed with sulfuric acid. (D) central particle of **degenerated** gel, surrounded by methane sulfonic acid mixed with sulfuric acid.

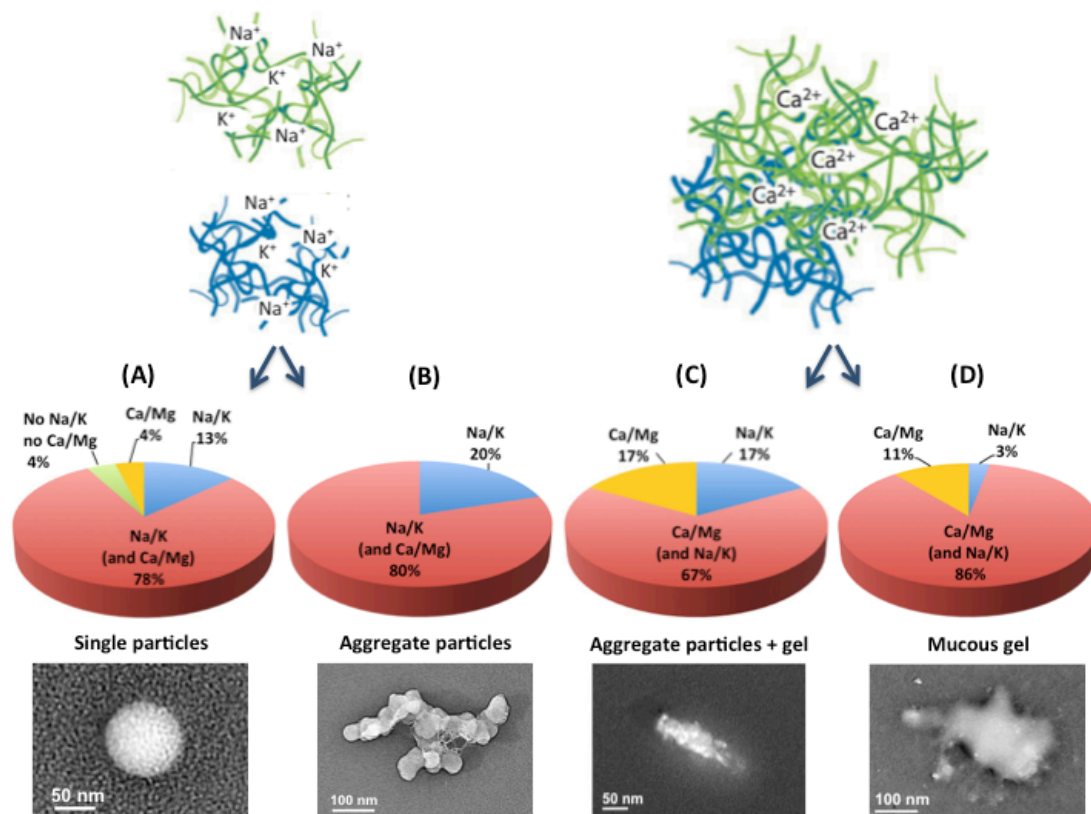

Figure 11. Fraction of particles containing the following ions: Na<sup>+</sup>/K<sup>+</sup> (blue), Ca<sup>2+</sup>/Mg<sup>2+</sup> (yellow), Na<sup>+</sup>/K<sup>+</sup> and minor contents of Ca<sup>2+</sup>/Mg<sup>2+</sup> (red), and neither Na<sup>+</sup>/K<sup>+</sup> nor Ca<sup>2+</sup>/Mg<sup>2+</sup> (green). (A) Single particles comprised of gel matter. (B) “mucus-like” particles. (C) “aggregate” particles. (D) “aggregate with film” particles.

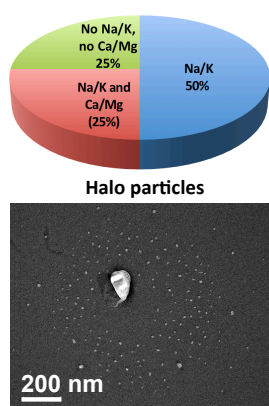

Figure 12. Fraction of HP containing the following ions: Na<sup>+</sup>/K<sup>+</sup> (blue), Na<sup>+</sup>/K<sup>+</sup> and Ca<sup>2+</sup>/Mg<sup>2+</sup> (red), and neither Na<sup>+</sup>/K<sup>+</sup> nor Ca<sup>2+</sup>/Mg<sup>2+</sup> (green).
