# Supplementary material for: Size resolved morphological properties of the high Arctic summer aerosol during ASCOS-2008
Source: Copernicus journal article supplement (doi:10.5194/acp-2015-966), 2016-01-19
Supplement: Supplementary file [file acp-2015-966-AC4-supplement.pdf]

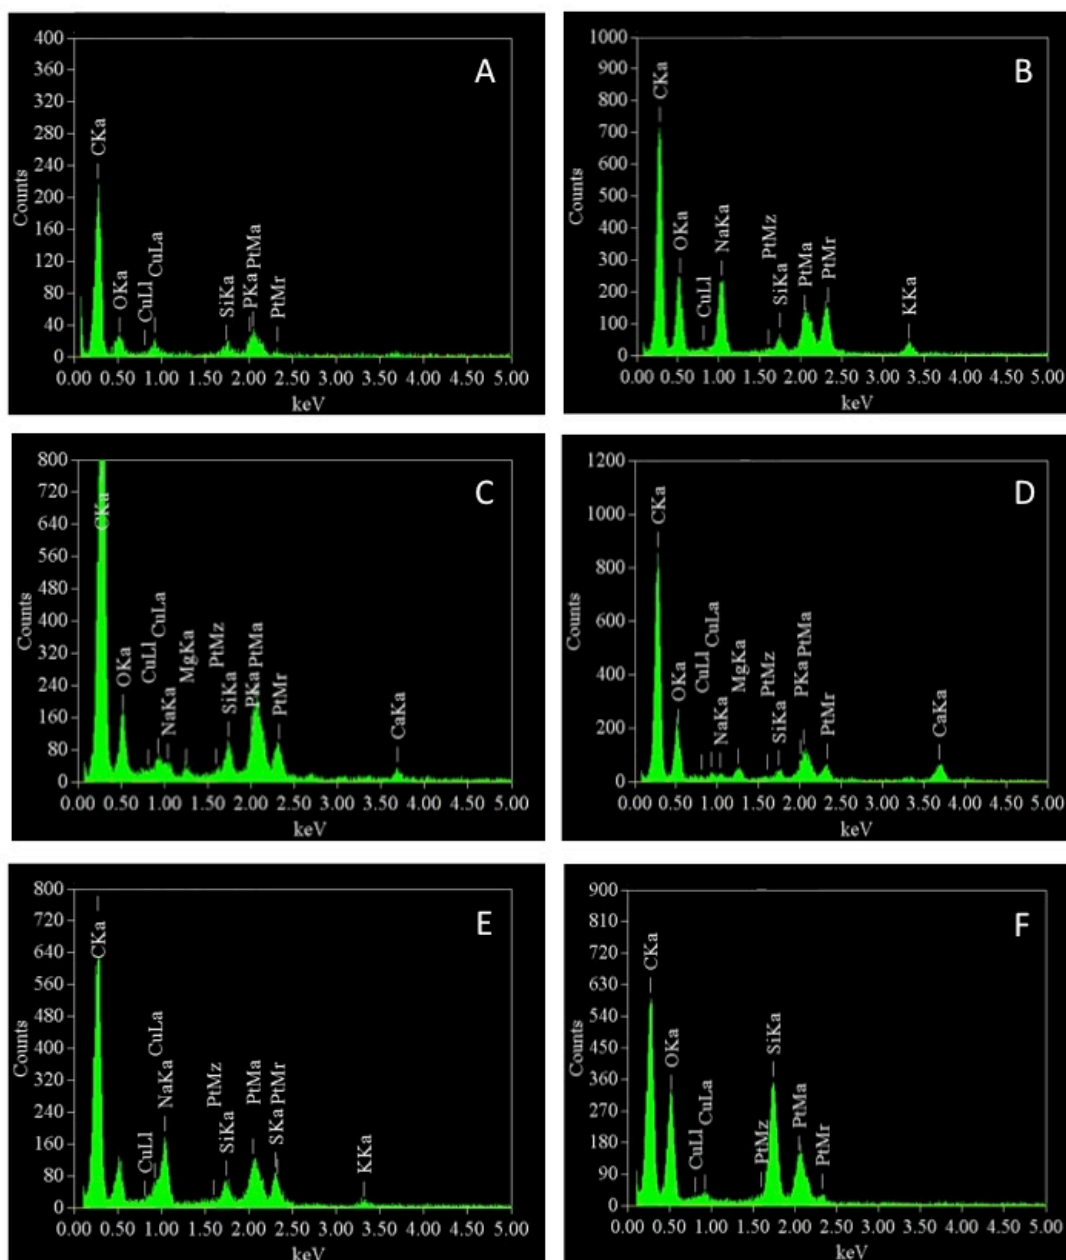

Figure S1: Examples of EDX spectra of aerosol particle investigated in this study. (A) single particle containing neither  $\text{Na}^+/\text{K}^+$  nor  $\text{Ca}^{2+}/\text{Mg}^{2+}$ . (B) “aggregate” particle containing  $\text{Na}^+/\text{K}^+$ . (C) “aggregate with film” particle containing  $\text{Na}^+$  and minor contents of  $\text{Ca}^{2+}/\text{Mg}^{2+}$ . (D) “mucus-like” particle containing  $\text{Ca}^{2+}/\text{Mg}^{2+}$  and minor contents of  $\text{Na}^+$ . (E) halo particle containing  $\text{Na}^+/\text{K}^+$  and S probably in the satellite particles. (F) blank spectrum taken from a Pt-shadowed TEM grid.
